# Supplementary material for: Tenofovir-Associated Bone Adverse Outcomes among a US National Historical Cohort of HIV-Infected Veterans: Risk Modification by Concomitant Antiretrovirals
Source: Springer Nature journal article supplement (doi:10.1007/s40121-018-0194-1), 2018-02-28
Supplement: MOESM1 [file 15497638]

## SUPPLEMENTAL DIGITAL CONTENT

**TABLE 1.** Diagnosis Codes for HIV Infection

| <b>Category</b>                | <b>Codes</b>          |
|--------------------------------|-----------------------|
| Valid ICD-9 diagnosis codes    | 042*, V08*, or 795.71 |
| Valid ICD-10 diagnosis codes   | B20*                  |
| Diagnostic-related group codes | 488–490               |

ICD-9, International Classification of Diseases, 9th Revision; ICD-10, International Classification of Diseases, 10th Revision.

**TABLE 2.** Bone Adverse Outcomes Defined by Diagnosis Codes<sup>1</sup>

*Osteoporosis*<sup>1,2-4</sup>

- Valid ICD-9 diagnosis codes: DX 733.00, 733.01, 733.02, 733.03, 733.09
  - *Abbreviated list of ICD-9 diagnosis codes: 733.0\**
- Valid ICD-10 diagnosis codes: DX M80.00XA, M80.00XD, M80.00XG, M80.00XP, M80.00XS, M80.011A, M80.011D, M80.011G, M80.011K, M80.011P, M80.011S, M80012A, M80.012D, M80.012G, M80.012K, M80.012P, M80.012S, M80.019A, M80.019D, M80.019G, M80.019K, M80.019P, M80019S, M80.021A, M80.021D, M80.021G, M80.021K, M80.021P, M80.021S, M80.022A, M80.022D, M80.022G, M80.022K, M80022P, M80.022S, M80.029A, M80.029D, M80.029G, M80.029K, M80.029P, M80.029S, M80.031A, M80.031D, M80.031G, M80031K, M80.031P, M80.031S, M80.032A, M80.032D, M80.032G, M80.032K, M80.032P, M80.032S, M80.039A, M80.039D, M80039G, M80.039K, M80.039P, M80.039S, M80.041A, M80.041D, M80.041G, M80.041K, M80.041P, M80.041S, M80.042A, M80042D, M80.042G, M80.042K, M80.042P, M80.042S, M80.049A, M80.049D, M80.049G, M80.049K, M80.049P, M80.049S, M80051A, M80.051D, M80.051G, M80.051K, M80.051P, M80.051S, M80.052A, M80.052D, M80.052G, M80.052K, M80.052P, M80052S, M80.059A, M80.059D, M80.059G, M80.059K, M80.059P, M80.059S, M80.061A, M80.061D, M80.061G, M80.061K, M80061P, M80.061S, M80.062A, M80.062D, M80.062G, M80.062K, M80.062P, M80.062S, M80.069A, M80.069D, M80.069G, M80069K, M80.069P, M80.069S, M80.071A, M80.071D, M80.071G, M80.071K, M80.071P, M80.071S, M80.072A, M80.072D, M80072G, M80.072K, M80.072P, M80.072S, M80.079A, M80.079D, M80.079G, M80.079K, M80.079P, M80.079S, M80.08XA, M8008XD, M80.08XG, M80.08XK, M80.08XP, M80.08XS, M80.80XA, M80.80XD, M80.80XG, M80.80XK, M80.80XP, M80.80XS, M80811A, M80.811D, M80.811G, M80.811K, M80.811P, M80.811S, M80.812A, M80.812D, M80.812G, M80.812K, M80.812P, M80812S, M80.819A, M80.819D, M80.819G, M80.819K, M80.819P, M80.819S, M80.821A, M80.821D, M80.821G, M80.821K, M80821P, M80.821S, M80.822A, M80.822D, M80.822G, M80.822K, M80.822P, M80.822S, M80.829A, M80.829D, M80.829G, M80829K, M80.829P, M80.829S, M80.831A, M80.831D, M80.831G, M80.831K, M80.831P, M80.831S, M80.832A, M80.832D, M80832G, M80.832K, M80.832P, M80.832S, M80.839A, M80.839D, M80.839G, M80.839K, M80.839P, M80.839S, M80.841A, M80841D, M80.841G, M80.841K, M80.841P, M80.841S, M80.842A, M80.842D, M80.842G, M80.842K, M80.842P, M80.842S, M80849A, M80.849D, M80.849G, M80.849K, M80.849P, M80.849S, M80.851A, M80.851D, M80.851G, M80.851K, M80.851P, M80851S, M80.852A, M80.852D, M80.852G, M80.852K, M80.852P, M80.852S, M80.859A, M80.859D, M80.859G, M80.859K, M80859P, M80.859S, M80.861A, M80.861D, M80.861G, M80.861K, M80.861P, M80.861S, M80.862A, M80.862D, M80.862G, M80862K, M80.862P, M80.862S, M80.869A, M80.869D, M80.869G, M80.869K, M80.869P, M80.869S, M80.871A, M80.871D, M80871G, M80.871K, M80.871P,

M80.871S, M80.872A, M80.872D, M80.872G, M80.872K, M80.872P, M80.872S, M80.879A, M80.879D, M80.879G, M80.879K, M80.879P, M80.879S, M80.88XA, M80.88XD, M80.88XG, M80.88XK, M80.88XP, M80.88XS, M81.0, M81.6, M81.8

- *Note: All M80.\*\*\*\* codes were excluded from the CMS list. These are codes for osteoporosis in the context of a specific fracture.*
- *Note: M81.\* codes are from the CMS list*
- *Abbreviated list of ICD-10 diagnosis codes: M80.\*\*\*\* through M81.\**

### ***Hip or Pelvic Fracture<sup>1,5</sup>***

- Valid ICD-9 diagnosis codes: DX 733.14, 733.15, 733.96, 733.97, 733.98, 808.0, 808.1, 808.2, 808.3, 808.41, 808.42, 808.43, 808.44, 808.49, 808.51, 808.52, 808.53, 808.54, 808.59, 808.8, 808.9, 820.00, 820.01, 820.02, 820.03, 820.09, 820.10, 820.11, 820.12, 820.13, 820.19, 820.20, 820.21, 820.22, 820.30, 820.31, 820.32, 820.8, 820.9, 821.00, 821.10
  - *Note: Codes 821.00 and 821.10 were excluded from the CMS list. These codes are for a fracture of an “unspecified” part of the femur. However, these codes are analogous to 733.15 (pathologic fracture of other specified part of femur), which is included in the CMS list.*
  - *Abbreviated list of ICD-9 diagnosis codes: 733.14, 733.15, 733.96, 733.97, 733.98, 808.\*, 808.\*\*, 820.\*, 820.\*\*, 821.00, 821.10*
- Valid ICD-9 procedure codes: 79.05, 79.093, 79.15, 79.151, 79.193, 79.25, 79.35, 79.351, 79.352
- Valid ICD-10 diagnosis codes: DX M80.051A, M80.051D, M80.051G, M80.052K, M80.051P, M80.051S, M80.052A, M80.052D, M80.052G, M80.052K, M80.052P, M80.052S, M80.059A, M80.059D, M80.059G, M80.059K, M80.059P, M80.059S, M80.851A, M80.851D, M80.851G, M80.851K, M80.851P, M80.851S, M80.852A, M80.852D, M80.852G, M80.852K, M80.852P, M80.852S, M80.859A, M80.859D, M80.859G, M80.859K, M80.859P, M80.859S, M84.350A, M84.350D, M84.350G, M84.350K, M84.350P, M84.350S, M84.351A, M84.351D, M84.351G, M84.351K, M84.351P, M84.351S, M84.352A, M84.352D, M84.352G, M84.352K, M84.352P, M84.352S, M84.353A, M84.353D, M84.353G, M84.353K, M84.353P, M84.353S, M84.359A, M84.359D, M84.359G, M84.359K, M84.359P, M84.359S, M84.451A, M84.451D, M84.451G, M84.451K, M84.451P, M84.451S, M84.452A, M84.452D, M84.452G, M84.452K, M84.452P, M84.452S, M84.453A, M84.453D, M84.453G, M84.453K, M84.453P, M84.453S, M84.454A, M84.454D, M84.454G, M84.454K, M84.454P, M84.454S, M84.459A, M84.459D, M84.459G, M84.459K, M84.459P, M84.459S, M84.550A, M84.550D, M84.550G, M84.550K, M84.550P, M84.550S, M84.551A, M84.551D, M84.551G, M84.551K, M84.551P, M84.551S, M84.552A, M84.552D, M84.552G, M84.552K, M84.552P, M84.552S, M84.553A, M84.553D, M84.553G, M84.553K, M84.553P, M84.553S, M84.559A, M84.559D, M84.559G, M84.559K, M84.559P, M84.559S, M84.650A, M84.650D, M84.650G, M84.650K, M84.650P, M84.650S, M84.651A, M84.651D, M84.651G, M84.651K, M84.651P, M84.651S, M84.652A, M84.652D, M84.652G, M84.652K, M84.652P, M84.652S, M84.653A, M84.653D, M84.653G, M84.653K, M84.653P, M84.653S, M84.659A, M84.659D, M84.659G, M84.659K, M84.659P, M84.659S, S32.301A, S32.301B, S32.301D, S32.301G, S32.301K, S32.301S, S32.302A, S32.302B, S32.302D, S32.302G, S32.302K,



S32.491B, S32.491D, S32.491G, S32.491K, S32.491S, S32.492A, S32.492B, S32.492D, S32.492G, S32.492K, S32.492S, S32.499A, S32.499B, S32.499D, S32.499G, S32.499K, S32.499S, S32.501A, S32.501B, S32.501D, S32.501G, S32.501K, S32.501S, S32.502A, S32.502B, S32.502D, S32.502G, S32.502K, S32.502S, S32.509A, S32.509B, S32.509D, S32.509G, S32.509K, S32.509S, S32.511A, S32.511B, S32.511D, S32.511G, S32.511K, S32.511S, S32.512A, S32.512B, S32.512D, S32.512G, S32.512K, S32.512S, S32.519A, S32.519B, S32.519D, S32.519G, S32.519K, S32.519S, S32.591A, S32.591B, S32.591D, S32.591G, S32.591K, S32.591S, S32.592A, S32.592B, S32.592D, S32.592G, S32.592K, S32.592S, S32.599A, S32.599B, S32.599D, S32.599G, S32.599K, S32.599S, S32.601A, S32.601B, S32.601D, S32.601G, S32.601K, S32.601S, S32.602A, S32.602B, S32.602D, S32.602G, S32.602K, S32.602S, S32.609A, S32.609B, S32.609D, S32.609G, S32.609K, S32.609S, S32.611A, S32.611B, S32.611D, S32.611G, S32.611K, S32.611S, S32.612A, S32.612B, S32.612D, S32.612G, S32.612K, S32.612S, S32.613A, S32.613B, S32.613D, S32.613G, S32.613K, S32.613S, S32.614A, S32.614B, S32.614D, S32.614G, S32.614K, S32.614S, S32.615A, S32.615B, S32.615D, S32.615G, S32.615K, S32.615S, S32.616A, S32.616B, S32.616D, S32.616G, S32.616K, S32.616S, S32.691A, S32.691B, S32.691D, S32.691G, S32.691K, S32.691S, S32.692A, S32.692B, S32.692D, S32.692G, S32.692K, S32.692S, S32.699A, S32.699B, S32.699D, S32.699G, S32.699K, S32.699S, S32.810A, S32.810B, S32.810D, S32.810G, S32.810K, S32.810S, S32.811A, S32.811B, S32.811D, S32.811G, S32.811K, S32.811S, S32.82XA, S32.82XB, S32.82XD, S32.82XG, S32.82XK, S32.82XS, S32.89XA, S32.89XB, S32.89XD, S32.89XG, S32.89XK, S32.89XS, S32.9XXA, S32.9XXB, S32.9XXD, S32.9XXG, S32.9XXK, S32.9XXS, S72.001A, S72.001B, S72.001C, S72.001D, S72.001E, S72.001F, S72.001G, S72.001H, S72.001J, S72.001K, S72.001M, S72.001N, S72.001P, S72.001Q, S72.001R, S72.001S, S72.002A, S72.002B, S72.002C, S72.002D, S72.002E, S72.002F, S72.002G, S72.002H, S72.002J, S72.002K, S72.002M, S72.002N, S72.002P, S72.002Q, S72.002R, S72.002S, S72.009A, S72.009B, S72.009C, S72.009D, S72.009E, S72.009F, S72.009G, S72.009H, S72.009J, S72.009K, S72.009M, S72.009N, S72.009P, S72.009Q, S72.009R, S72.009S, S72.011A, S72.011B, S72.011C, S72.011D, S72.011E, S72.011F, S72.011G, S72.011H, S72.011J, S72.011K, S72.011M, S72.011N, S72.011P, S72.011Q, S72.011R, S72.011S, S72.012A, S72.012B, S72.012C, S72.012D, S72.012E, S72.012F, S72.012G, S72.012H, S72.012J, S72.012K, S72.012M, S72.012N, S72.012P, S72.012Q, S72.012R, S72.012S, S72.019A, S72.019B, S72.019C, S72.019D, S72.019E, S72.019F, S72.019G, S72.019H, S72.019J, S72.019K, S72.019M, S72.019N, S72.019P, S72.019Q, S72.019R, S72.019S, S72.021A, S72.021B, S72.021C, S72.021D, S72.021E, S72.021F, S72.021G, S72.021H, S72.021J, S72.021K, S72.021M, S72.021N, S72.021P, S72.021Q, S72.021R, S72.021S, S72.022A, S72.022B, S72.022C, S72.022D, S72.022E, S72.022F, S72.022G, S72.022H, S72.022J, S72.022K, S72.022M, S72.022N, S72.022P, S72.022Q, S72.022R, S72.022S, S72.023A, S72.023B, S72.023C, S72.023D, S72.023E, S72.023F, S72.023G, S72.023H, S72.023J, S72.023K, S72.023M, S72.023N, S72.023P, S72.023Q, S72.023R, S72.023S, S72.024A, S72.024B, S72.024C, S72.024D, S72.024E, S72.024F, S72.024G, S72.024H, S72.024J, S72.024K, S72.024M, S72.024N, S72.024P, S72.024Q, S72.024R, S72.024S, S72.025A, S72.025B, S72.025C, S72.025D, S72.025E, S72.025F, S72.025G, S72.025H, S72.025J, S72.025K, S72.025M, S72.025N, S72.025P, S72.025Q, S72.025R, S72.025S, S72.026A, S72.026B, S72.026C, S72.026D, S72.026E, S72.026F, S72.026G, S72.026H, S72.026J, S72.026K, S72.026M, S72.026N, S72.026P, S72.026Q, S72.026R, S72.026S, S72.031A,





S72.142B, S72.142C, S72.142D, S72.142E, S72.142F, S72.142G, S72.142H, S72.142J, S72.142K, S72.142M, S72.142N, S72.142P, S72.142Q, S72.142R, S72.142S, S72.143A, S72.143B, S72.143C, S72.143D, S72.143E, S72.143F, S72.143G, S72.143H, S72.143J, S72.143K, S72.143M, S72.143N, S72.143P, S72.143Q, S72.143R, S72.143S, S72.144A, S72.144B, S72.144C, S72.144D, S72.144E, S72.144F, S72.144G, S72.144H, S72.144J, S72.144K, S72.144M, S72.144N, S72.144P, S72.144Q, S72.144R, S72.144S, S72.145A, S72.145B, S72.145C, S72.145D, S72.145E, S72.145F, S72.145G, S72.145H, S72.145J, S72.145K, S72.145M, S72.145N, S72.145P, S72.145Q, S72.145R, S72.145S, S72.146A, S72.146B, S72.146C, S72.146D, S72.146E, S72.146F, S72.146G, S72.146H, S72.146J, S72.146K, S72.146M, S72.146N, S72.146P, S72.146Q, S72.146R, S72.146S, S72.21XA, S72.21XB, S72.21XC, S72.21XD, S72.21XE, S72.21XF, S72.21XG, S72.21XH, S72.21XJ, S72.21XK, S72.21XM, S72.21XN, S72.21XP, S72.21XQ, S72.21XR, S72.21XS, S72.22XA, S72.22XB, S72.22XC, S72.22XD, S72.22XE, S72.22XF, S72.22XG, S72.22XH, S72.22XJ, S72.22XK, S72.22XM, S72.22XN, S72.22XP, S72.22XQ, S72.22XR, S72.22XS, S72.23XA, S72.23XB, S72.23XC, S72.23XD, S72.23XE, S72.23XF, S72.23XG, S72.23XH, S72.23XJ, S72.23XK, S72.23XM, S72.23XN, S72.23XP, S72.23XQ, S72.23XR, S72.23XS, S72.24XA, S72.24XB, S72.24XC, S72.24XD, S72.24XE, S72.24XF, S72.24XG, S72.24XH, S72.24XJ, S72.24XK, S72.24XM, S72.24XN, S72.24XP, S72.24XQ, S72.24XR, S72.24XS, S72.25XA, S72.25XB, S72.25XC, S72.25XD, S72.25XE, S72.25XF, S72.25XG, S72.25XH, S72.25XJ, S72.25XK, S72.25XM, S72.25XN, S72.25XP, S72.25XQ, S72.25XR, S72.25XS, S72.26XA, S72.26XB, S72.26XC, S72.26XD, S72.26XE, S72.26XF, S72.26XG, S72.26XH, S72.26XJ, S72.26XK, S72.26XM, S72.26XN, S72.26XP, S72.26XQ, S72.26XR, S72.26XS, S79.001A, S79.001D, S79.001G, S79.001K, S79.001P, S79.001S, S79.002A, S79.002D, S79.002G, S79.002K, S79.002P, S79.002S, S79.009A, S79.009D, S79.009G, S79.009K, S79.009P, S79.009S, S79.011A, S79.011D, S79.011G, S79.011K, S79.011P, S79.011S, S79.012A, S79.012D, S79.012G, S79.012K, S79.012P, S79.012S, S79.019A, S79.019D, S79.019G, S79.019K, S79.019P, S79.019S, S79.091A, S79.091D, S79.091G, S79.091K, S79.091P, S79.091S, S79.092A, S79.092D, S79.092G, S79.092K, S79.092P, S79.092S, S72.099A, S72.099D, S72.099G, S72.099K, S72.099P, S72.099S

- *Note: The codes that end in D, E, F, G, H, J, K, M, N, P, Q, R, or S are excluded from the CMS list. These are for subsequent encounters. (A codes are for the initial encounters.) However, given our analytic approach, if the primary encounter is included in VA or Medicare data, the patient will be censored and subsequent encounters will not be counted. However, if the initial encounter is not captured, we want to capture it on a subsequent encounter, so these codes were included.*
- *Note: The codes M84.454A (pathologic fracture of the pelvis) and M84.550A (pathologic fracture of the pelvis in neoplastic disease) are excluded from the CMS list. However, given that the analogous pelvic fractures in other sections are included in this list of “hip or pelvic fractures”, we have included them.*
- *Abbreviated list of ICD-10 diagnosis codes: M80.05\*\*, M80.85\*\*, M84.35\*\*, M84.45\*\*, M84.55\*\*, M84.65\*\*, S32.3\*\*\* through S32.9\*\*\*, S72.0\*\*\* through S72.2\*\*\*, S79.0\*\*\**
- Valid ICD-10 procedure codes: OQS.204Z, OQS.205Z, OQS.20ZZ, OQS.23ZZ, OQS.2XZZ, OQS.304Z, OQS.345Z, OQS.34ZZ, OQS.3XZZ, OQS.404Z, OQS.40ZZ, OQS.504Z, OQS.54ZZ, OQS.5XZZ, OQS.604Z, OQS.605Z, OQS.606Z, OQS.60BZ, OQS.60CZ, OQS.60DZ, OQS.635Z, OQS.63CZ, OQS.63ZZ, OQS.645Z, OQS.646Z, OQS.64BZ,



OQS.64CZ, OQS.64DZ, OQS.70BZ, OQS.70DZ, OQS.734Z, OQS.735Z, OQS.736Z, OQS.73BZ, OQS.745Z, OQS.746Z, OQS.74CZ, OQS.234Z, OQS.235Z, OQS.244Z, OQS.245Z, OQS.24ZZ, OQS.305Z, OQS.30ZZ, OQS.334Z, OQS.335Z, OQS.33ZZ, OQS.344Z, OQS.434Z, OQS.43ZZ, OQS.444Z, OQS.44ZZ, OQS.4XZZ, OQS.50ZZ, OQS.534Z, OQS.53ZZ, OQS.544Z, OQS.60ZZ, OQS.634Z, OQS.636Z, OQS.63BZ, OQS.63DZ, OQS.644Z, OQS.64ZZ, OQS.6XZZ, OQS.704Z, OQS.705Z, OQS.706Z, OQS.70CZ, OQS.70ZZ, OQS.73CZ, OQS.73DZ, OQS.73ZZ, OQS.744Z, OQS.74BZ, OQS.74DZ, OQS.74ZZ, OQS.7XZZ, OSS.905Z, OSS.90ZZ, OSS.934Z, OSS.935Z, OSS.93ZZ, OSS.9X4Z, OSS.9X5Z, OSS.B04Z, OSS.B0ZZ, OSS.B34Z, OSS.B35Z, OSS.B44Z, OSS.B45Z, OSS.904Z, OSS.944Z, OSS.945Z, OSS.94ZZ, OSS.9XZZ, OSS.B05Z, OSS.B3ZZ, OSS.B4ZZ, OSS.BX4Z, OSS.BX5Z, OSS.BXZZ

- *Abbreviated list of ICD-10 procedure codes: OQS.2\*\*\* through OQS.7\*\*\*, OSS.9\*\*\*, OSS.B\*\*\**

- Valid CPT procedure codes: 27193, 27194, 27210, 27212, 27214, 27215, 27216, 27217, 27218, 27220, 27222, 27224, 27225, 27226, 27227, 27228
  - *Abbreviated list of CPT codes: 27193, 27194, 27210 through 27228*

***Vertebral Fractures (including thoracic and lumbar spine)***

- Valid ICD-9 diagnosis codes: DX 733.13, 806.20, 806.21, 806.22, 806.23, 806.24, 806.25, 806.26, 806.27, 806.28, 806.29, 806.30, 806.31, 806.32, 806.33, 806.34, 806.35, 806.36, 806.37, 806.38, 806.39, 806.4, 806.5
  - *Note: CMS does not include this category of fractures in their CCW Conditions Algorithm. We selected these codes manually from complete ICD-9 tables using the same principles we applied above*
  - *Abbreviated list of ICD-9 diagnosis codes: 733.13, 805.2 through 805.9, 806.2\* through 806.3\*, 806.5*
- Valid ICD-9 procedure code: 03.53
- Valid ICD-10 diagnosis codes: DX M48.44XA, M48.44XD, M48.44XG, M48.44XS, M48.45XA, M48.45XD, M48.45XG, M48.45XS, M48.46XA, M48.46XD, M48.46XG, M48.46XS, M48.47XA, M48.47XD, M48.47XG, M48.47XS, M48.54XA, M48.54XD, M48.54XG, M48.54XS, M48.55XA, M48.55XD, M48.55XG, M48.55XS, M48.56XA, M48.56XD, M48.56XG, M48.56XS, M48.57XA, M48.57XD, M48.57XG, M48.57XS, M80.08XA, M80.08XD, M80.08XG, M80.08XK, M80.08XP, M80.08XS, M80.88XA, M80.88XD, M80.88XG, M80.88XK, M80.88XP, M80.88XS, S22.000A, S22.000B, S22.000D, S22.000G, S22.000K, S22.000S, S22.001A, S22.001B, S22.001D, S22.001G, S22.001K, S22.001S, S22.002A, S22.002B, S22.002D, S22.002G, S22.002K, S22.002S, S22.008A, S22.008B, S22.008D, S22.008G, S22.008K, S22.008S, S22.009A, S22.009B, S22.009D, S22.009G, S22.009K, S22.009S, S22.010A, S22.010B, S22.010D, S22.010G, S22.010K, S22.010S, S22.011A, S22.011B, S22.011D, S22.011G, S22.011K, S22.011S, S22.012A, S22.012B, S22.012D, S22.012G, S22.012K, S22.012S, S22.018A, S22.018B, S22.018D, S22.018G, S22.018K, S22.018S, S22.019A, S22.019B, S22.019D, S22.019G, S22.019K, S22.019S, S22.020A, S22.020B, S22.020D, S22.020G, S22.020K, S22.020S, S22.021A, S22.021B, S22.021D, S22.021G, S22.021K, S22.021S, S22.022A, S22.022B, S22.022D, S22.022G, S22.022K, S22.022S, S22.028A, S22.028B, S22.028D, S22.028G,



- *Note: CMS does not include this category of fractures in their CCW Conditions Algorithm. We selected these codes manually from complete ICD-10 tables using the same principles we applied above*
- *Abbreviated list of ICD-10 diagnosis codes: M48.44\*\* through M48.47\*\*, M48.54\*\* through M48.57\*\*, M80.08\*\*, M80.88\*\*, S22.0\*\*\*, S32.0\*\*\**
- Valid ICD-10 procedure codes: OPS.404Z, OPS.40ZZ, OPS.434Z, OPS.43ZZ, OPS.444Z, OPS.44ZZ, OPS.4XZZ, OQS.004Z, OQS.00ZZ, OQS.034Z, OQS.03ZZ, OQS.044Z, OQS.04ZZ, OQS.0XZZ, ORS.404Z, ORS.40ZZ, ORS.434Z, ORS.43ZZ, ORS.444Z, ORS.44ZZ, ORS.4X4Z, ORS.4XZZ, ORS.604Z, ORS.60ZZ, ORS.634Z, ORS.63ZZ, ORS.644Z, ORS.64ZZ, ORS.6X4Z, ORS.6XZZ, ORS.A04Z, ORS.A0ZZ, ORS.A34Z, ORS.A3ZZ, ORS.A44Z, ORS.A4ZZ, ORS.AX4Z, ORS.AXZZ, OSS.004Z, OSS.00ZZ, OSS.034Z, OSS.03ZZ, OSS.044Z, OSS.04ZZ, OSS.0X4Z, OSS.0XZZ, OSS.304Z, OSS.30ZZ, OSS.334Z, OSS.33ZZ, OSS.344Z, OSS.34ZZ, OSS.3X4Z, OSS.3XZZ, XNS.0032, XNS.0432, XNS.4032, XNS.4432
  - *Abbreviated list of ICD-10 procedure codes: OPS.4\*\*\*, OQS.0\*\*\*, ORS.4\*\*\* through ORS.6\*\*\*, ORS.A\*\*\*, OSS.0\*\*\* through OSS.3\*\*\*, XNS.0\*\*\*, XNS.4\*\*\**

### **Wrist or Forearm Fractures**

- Valid ICD-9 diagnosis codes: DX 733.12, 813.00, 813.01, 813.02, 813.03, 813.04, 813.05, 813.06, 813.07, 813.08, 813.10, 813.11, 813.12, 813.13, 813.14, 813.15, 813.16, 813.17, 813.18, 813.20, 813.21, 813.22, 813.23, 813.30, 813.31, 813.32, 813.33, 813.40, 813.41, 813.42, 813.43, 813.44, 813.45, 813.46, 813.47, 813.50, 813.51, 813.52, 813.53, 813.54, 813.80, 813.81, 813.82, 813.83, 813.90, 813.91, 813.92, 813.93, 814.00, 814.01, 814.02, 814.03, 814.04, 814.05, 814.06, 814.07, 814.08, 814.09, 814.10, 814.11, 814.12, 814.13, 814.14, 814.15, 814.16, 814.17, 814.18, 814.19
  - *Note: CMS does not include this category of fractures in their CCW Conditions Algorithm. We selected these codes manually from complete ICD-9 tables using the same principles we applied above*
  - *Abbreviated list of ICD-9 diagnosis codes: 733.12, 813.\*\* through 814.\*\**
- Valid ICD-9 procedure codes: 78.030, 78.031, 78.032, 78.040, 78.041, 78.042, 78.13, 78.14, 79.02, 79.03, 79.12, 79.13, 79.22, 79.23, 79.32, 79.33, 79.62, 79.63
- Valid ICD-10 diagnosis codes: DX M80.031A, M80.031D, M80.031G, M80.031K, M80.031P, M80.031S, M80.032A, M80.032D, M80.032G, M80.032K, M80.032P, M80.032S, M80.039A, M80.039D, M80.039G, M80.039K, M80.039P, M80.039S, M80.831A, M80.831D, M80.831G, M80.831K, M80.831P, M80.831S, M80.832A, M80.832D, M80.832G, M80.832K, M80.832P, M80.832S, M80.839A, M80.839D, M80.839G, M80.839K, M80.839P, M80.839S, M84.331A, M84.331D, M84.331G, M84.331K, M84.331P, M84.331S, M84.332A, M84.332D, M84.332G, M84.332K, M84.332P, M84.332S, M84.333A, M84.333D, M84.333G, M84.333K, M84.333P, M84.333S, M84.334A, M84.334D, M84.334G, M84.334K, M84.334P, M84.334S, M84.339A, M84.339D, M84.339G, M84.339K, M84.339P, M84.339S, M84.431A, M84.431D, M84.431G, M84.431K, M84.431P, M84.431S, M84.432A, M84.432D, M84.432G, M84.432K, M84.432P, M84.432S, M84.433A, M84.433D, M84.433G, M84.433K, M84.433P, M84.433S, M84.434A, M84.434D, M84.434G, M84.434K,

M84.434P, M84.434S, M84.439A, M84.439D, M84.439G, M84.439K, M84.439P, M84.439S, M84.531A, M84.531D, M84.531G, M84.531K, M84.531P, M84.531S, M84.532A, M84.532D, M84.532G, M84.532K, M84.532P, M84.532S, M84.533A, M84.533D, M84.533G, M84.533K, M84.533P, M84.533S, M84.534A, M84.534D, M84.534G, M84.534K, M84.534P, M84.534S, M84.539A, M84.539D, M84.539G, M84.539K, M84.539P, M84.539S, M84.631A, M84.631D, M84.631G, M84.631K, M84.631P, M84.631S, M84.632A, M84.632D, M84.632G, M84.632K, M84.632P, M84.632S, M84.633A, M84.633D, M84.633G, M84.633K, M84.633P, M84.633S, M84.634A, M84.634D, M84.634G, M84.634K, M84.634P, M84.634S, M84.639A, M84.639D, M84.639G, M84.639K, M84.639P, M84.639S, S52.001A, S52.001B, S52.001C, S52.001D, S52.001E, S52.001F, S52.001G, S52.001H, S52.001J, S52.001K, S52.001M, S52.001N, S52.001P, S52.001Q, S52.001R, S52.001S, S52.002A, S52.002B, S52.002C, S52.002D, S52.002E, S52.002F, S52.002G, S52.002H, S52.002J, S52.002K, S52.002M, S52.002N, S52.002P, S52.002Q, S52.002R, S52.002S, S52.009A, S52.009B, S52.009C, S52.009D, S52.009E, S52.009F, S52.009G, S52.009H, S52.009J, S52.009K, S52.009M, S52.009N, S52.009P, S52.009Q, S52.009R, S52.009S, S52.011A, S52.011D, S52.011G, S52.011K, S52.011P, S52.011S, S52.012A, S52.012D, S52.012G, S52.012K, S52.012P, S52.012S, S52.019A, S52.019D, S52.019G, S52.019K, S52.019P, S52.019S, S52.021A, S52.021B, S52.021C, S52.021D, S52.021E, S52.021F, S52.021G, S52.021H, S52.021J, S52.021K, S52.021M, S52.021N, S52.021P, S52.021Q, S52.021R, S52.021S, S52.022A, S52.022B, S52.022C, S52.022D, S52.022E, S52.022F, S52.022G, S52.022H, S52.022J, S52.022K, S52.022M, S52.022N, S52.022P, S52.022Q, S52.022R, S52.022S, S52.023A, S52.023B, S52.023C, S52.023D, S52.023E, S52.023F, S52.023G, S52.023H, S52.023J, S52.023K, S52.023M, S52.023N, S52.023P, S52.023Q, S52.023R, S52.023S, S52.024A, S52.024B, S52.024C, S52.024D, S52.024E, S52.024F, S52.024G, S52.024H, S52.024J, S52.024K, S52.024M, S52.024N, S52.024P, S52.024Q, S52.024R, S52.024S, S52.025A, S52.025B, S52.025C, S52.025D, S52.025E, S52.025F, S52.025G, S52.025H, S52.025J, S52.025K, S52.025M, S52.025N, S52.025P, S52.025Q, S52.025R, S52.025S, S52.026A, S52.026B, S52.026C, S52.026D, S52.026E, S52.026F, S52.026G, S52.026H, S52.026J, S52.026K, S52.026M, S52.026N, S52.026P, S52.026Q, S52.026R, S52.026S, S52.031A, S52.031B, S52.031C, S52.031D, S52.031E, S52.031F, S52.031G, S52.031H, S52.031J, S52.031K, S52.031M, S52.031N, S52.031P, S52.031Q, S52.031R, S52.031S, S52.032A, S52.032B, S52.032C, S52.032D, S52.032E, S52.032F, S52.032G, S52.032H, S52.032J, S52.032K, S52.032M, S52.032N, S52.032P, S52.032Q, S52.032R, S52.032S, S52.033A, S52.033B, S52.033C, S52.033D, S52.033E, S52.033F, S52.033G, S52.033H, S52.033J, S52.033K, S52.033M, S52.033N, S52.033P, S52.033Q, S52.033R, S52.033S, S52.034A, S52.034B, S52.034C, S52.034D, S52.034E, S52.034F, S52.034G, S52.034H, S52.034J, S52.034K, S52.034M, S52.034N, S52.034P, S52.034Q, S52.034R, S52.034S, S52.035A, S52.035B, S52.035C, S52.035D, S52.035E, S52.035F, S52.035G, S52.035H, S52.035J, S52.035K, S52.035M, S52.035N, S52.035P, S52.035Q, S52.035R, S52.035S, S52.036A, S52.036B, S52.036C, S52.036D, S52.036E, S52.036F, S52.036G, S52.036H, S52.036J, S52.036K, S52.036M, S52.036N, S52.036P, S52.036Q, S52.036R, S52.036S, S52.041A, S52.041B, S52.041C, S52.041D, S52.041E, S52.041F, S52.041G, S52.041H, S52.041J, S52.041K, S52.041M, S52.041N, S52.041P, S52.041Q, S52.041R, S52.041S, S52.042A, S52.042B, S52.042C, S52.042D, S52.042E, S52.042F, S52.042G, S52.042H, S52.042J, S52.042K, S52.042M, S52.042N, S52.042P, S52.042Q, S52.042R, S52.042S, S52.043A,













S52.509N, S52.509P, S52.509Q, S52.509R, S52.509S, S52.511A, S52.511B, S52.511C, S52.511D, S52.511E, S52.511F, S52.511G, S52.511H, S52.511J, S52.511K, S52.511M, S52.511N, S52.511P, S52.511Q, S52.511R, S52.511S, S52.512A, S52.512B, S52.512C, S52.512D, S52.512E, S52.512F, S52.512G, S52.512H, S52.512J, S52.512K, S52.512M, S52.512N, S52.512P, S52.512Q, S52.512R, S52.512S, S52.513A, S52.513B, S52.513C, S52.513D, S52.513E, S52.513F, S52.513G, S52.513H, S52.513J, S52.513K, S52.513M, S52.513N, S52.513P, S52.513Q, S52.513R, S52.513S, S52.514A, S52.514B, S52.514C, S52.514D, S52.514E, S52.514F, S52.514G, S52.514H, S52.514J, S52.514K, S52.514M, S52.514N, S52.514P, S52.514Q, S52.514R, S52.514S, S52.515A, S52.515B, S52.515C, S52.515D, S52.515E, S52.515F, S52.515G, S52.515H, S52.515J, S52.515K, S52.515M, S52.515N, S52.515P, S52.515Q, S52.515R, S52.515S, S52.516A, S52.516B, S52.516C, S52.516D, S52.516E, S52.516F, S52.516G, S52.516H, S52.516J, S52.516K, S52.516M, S52.516N, S52.516P, S52.516Q, S52.516R, S52.516S, S52.521A, S52.521D, S52.521G, S52.521K, S52.521P, S52.521S, S52.522A, S52.522D, S52.522G, S52.522K, S52.522P, S52.522S, S52.529A, S52.529D, S52.529G, S52.529K, S52.529P, S52.529S, S52.531A, S52.531B, S52.531C, S52.531D, S52.531E, S52.531F, S52.531G, S52.531H, S52.531J, S52.531K, S52.531M, S52.531N, S52.531P, S52.531Q, S52.531R, S52.531S, S52.532A, S52.532B, S52.532C, S52.532D, S52.532E, S52.532F, S52.532G, S52.532H, S52.532J, S52.532K, S52.532M, S52.532N, S52.532P, S52.532Q, S52.532R, S52.532S, S52.539A, S52.539B, S52.539C, S52.539D, S52.539E, S52.539F, S52.539G, S52.539H, S52.539J, S52.539K, S52.539M, S52.539N, S52.539P, S52.539Q, S52.539R, S52.539S, S52.541A, S52.541B, S52.541C, S52.541D, S52.541E, S52.541F, S52.541G, S52.541H, S52.541J, S52.541K, S52.541M, S52.541N, S52.541P, S52.541Q, S52.541R, S52.541S, S52.542A, S52.542B, S52.542C, S52.542D, S52.542E, S52.542F, S52.542G, S52.542H, S52.542J, S52.542K, S52.542M, S52.542N, S52.542P, S52.542Q, S52.542R, S52.542S, S52.549A, S52.549B, S52.549C, S52.549D, S52.549E, S52.549F, S52.549G, S52.549H, S52.549J, S52.549K, S52.549M, S52.549N, S52.549P, S52.549Q, S52.549R, S52.549S, S52.551A, S52.551B, S52.551C, S52.551D, S52.551E, S52.551F, S52.551G, S52.551H, S52.551J, S52.551K, S52.551M, S52.551N, S52.551P, S52.551Q, S52.551R, S52.551S, S52.552A, S52.552B, S52.552C, S52.552D, S52.552E, S52.552F, S52.552G, S52.552H, S52.552J, S52.552K, S52.552M, S52.552N, S52.552P, S52.552Q, S52.552R, S52.552S, S52.559A, S52.559B, S52.559C, S52.559D, S52.559E, S52.559F, S52.559G, S52.559H, S52.559J, S52.559K, S52.559M, S52.559N, S52.559P, S52.559Q, S52.559R, S52.559S, S52.561A, S52.561B, S52.561C, S52.561D, S52.561E, S52.561F, S52.561G, S52.561H, S52.561J, S52.561K, S52.561M, S52.561N, S52.561P, S52.561Q, S52.561R, S52.561S, S52.562A, S52.562B, S52.562C, S52.562D, S52.562E, S52.562F, S52.562G, S52.562H, S52.562J, S52.562K, S52.562M, S52.562N, S52.562P, S52.562Q, S52.562R, S52.562S, S52.569A, S52.569B, S52.569C, S52.569D, S52.569E, S52.569F, S52.569G, S52.569H, S52.569J, S52.569K, S52.569M, S52.569N, S52.569P, S52.569Q, S52.569R, S52.569S, S52.571A, S52.571B, S52.571C, S52.571D, S52.571E, S52.571F, S52.571G, S52.571H, S52.571J, S52.571K, S52.571M, S52.571N, S52.571P, S52.571Q, S52.571R, S52.571S, S52.572A, S52.572B, S52.572C, S52.572D, S52.572E, S52.572F, S52.572G, S52.572H, S52.572J, S52.572K, S52.572M, S52.572N, S52.572P, S52.572Q, S52.572R, S52.572S, S52.579A, S52.579B, S52.579C, S52.579D, S52.579E, S52.579F, S52.579G, S52.579H, S52.579J, S52.579K, S52.579M, S52.579N, S52.579P, S52.579Q, S52.579R, S52.579S, S52.591A, S52.591B, S52.591C, S52.591D, S52.591E, S52.591F, S52.591G, S52.591H, S52.591J,

S52.591K, S52.591M, S52.591N, S52.591P, S52.591Q, S52.591R, S52.591S, S52.592A, S52.592B, S52.592C, S52.592D, S52.592E, S52.592F, S52.592G, S52.592H, S52.592J, S52.592K, S52.592M, S52.592N, S52.592P, S52.592Q, S52.592R, S52.592S, S52.599A, S52.599B, S52.599C, S52.599D, S52.599E, S52.599F, S52.599G, S52.599H, S52.599J, S52.599K, S52.599M, S52.599N, S52.599P, S52.599Q, S52.599R, S52.599S, S52.601A, S52.601B, S52.601C, S52.601D, S52.601E, S52.601F, S52.601G, S52.601H, S52.601J, S52.601K, S52.601M, S52.601N, S52.601P, S52.601Q, S52.601R, S52.601S, S52.602A, S52.602B, S52.602C, S52.602D, S52.602E, S52.602F, S52.602G, S52.602H, S52.602J, S52.602K, S52.602M, S52.602N, S52.602P, S52.602Q, S52.602R, S52.602S, S52.609A, S52.609B, S52.609C, S52.609D, S52.609E, S52.609F, S52.609G, S52.609H, S52.609J, S52.609K, S52.609M, S52.609N, S52.609P, S52.609Q, S52.609R, S52.609S, S52.611A, S52.611B, S52.611C, S52.611D, S52.611E, S52.611F, S52.611G, S52.611H, S52.611J, S52.611K, S52.611M, S52.611N, S52.611P, S52.611Q, S52.611R, S52.611S, S52.612A, S52.612B, S52.612C, S52.612D, S52.612E, S52.612F, S52.612G, S52.612H, S52.612J, S52.612K, S52.612M, S52.612N, S52.612P, S52.612Q, S52.612R, S52.612S, S52.613A, S52.613B, S52.613C, S52.613D, S52.613E, S52.613F, S52.613G, S52.613H, S52.613J, S52.613K, S52.613M, S52.613N, S52.613P, S52.613Q, S52.613R, S52.613S, S52.614A, S52.614B, S52.614C, S52.614D, S52.614E, S52.614F, S52.614G, S52.614H, S52.614J, S52.614K, S52.614M, S52.614N, S52.614P, S52.614Q, S52.614R, S52.614S, S52.615A, S52.615B, S52.615C, S52.615D, S52.615E, S52.615F, S52.615G, S52.615H, S52.615J, S52.615K, S52.615M, S52.615N, S52.615P, S52.615Q, S52.615R, S52.615S, S52.616A, S52.616B, S52.616C, S52.616D, S52.616E, S52.616F, S52.616G, S52.616H, S52.616J, S52.616K, S52.616M, S52.616N, S52.616P, S52.616Q, S52.616R, S52.616S, S52.621A, S52.621D, S52.621G, S52.621K, S52.621P, S52.621S, S52.622A, S52.622D, S52.622G, S52.622K, S52.622P, S52.622S, S52.629A, S52.629D, S52.629G, S52.629K, S52.629P, S52.629S, S52.691A, S52.691B, S52.691C, S52.691D, S52.691E, S52.691F, S52.691G, S52.691H, S52.691J, S52.691K, S52.691M, S52.691N, S52.691P, S52.691Q, S52.691R, S52.691S, S52.692A, S52.692B, S52.692C, S52.692D, S52.692E, S52.692F, S52.692G, S52.692H, S52.692J, S52.692K, S52.692M, S52.692N, S52.692P, S52.692Q, S52.692R, S52.692S, S52.699A, S52.699B, S52.699C, S52.699D, S52.699E, S52.699F, S52.699G, S52.699H, S52.699J, S52.699K, S52.699M, S52.699N, S52.699P, S52.699Q, S52.699R, S52.699S, S52.90XA, S52.90XB, S52.90XC, S52.90XD, S52.90XE, S52.90XF, S52.90XG, S52.90XH, S52.90XJ, S52.90XK, S52.90XM, S52.90XN, S52.90XP, S52.90XQ, S52.90XR, S52.90XS, S52.91XA, S52.91XB, S52.91XC, S52.91XD, S52.91XE, S52.91XF, S52.91XG, S52.91XH, S52.91XJ, S52.91XK, S52.91XM, S52.91XN, S52.91XP, S52.91XQ, S52.91XR, S52.91XS, S52.92XA, S52.92XB, S52.92XC, S52.92XD, S52.92XE, S52.92XF, S52.92XG, S52.92XH, S52.92XJ, S52.92XK, S52.92XM, S52.92XN, S52.92XP, S52.92XQ, S52.92XR, S52.92XS, S59.001A, S59.001D, S59.001G, S59.001K, S59.001P, S59.001S, S59.002A, S59.002D, S59.002G, S59.002K, S59.002P, S59.002S, S59.009A, S59.009D, S59.009G, S59.009K, S59.009P, S59.009S, S59.011A, S59.011D, S59.011G, S59.011K, S59.011P, S59.011S, S59.012A, S59.012D, S59.012G, S59.012K, S59.012P, S59.012S, S59.019A, S59.019D, S59.019G, S59.019K, S59.019P, S59.019S, S59.021A, S59.021D, S59.021G, S59.021K, S59.021P, S59.021S, S59.022A, S59.022D, S59.022G, S59.022K, S59.022P, S59.022S, S59.029A, S59.029D, S59.029G, S59.029K, S59.029P, S59.029S, S59.031A, S59.031D, S59.031G, S59.031K, S59.031P, S59.031S, S59.032A, S59.032D, S59.032G, S59.032K, S59.032P, S59.032S, S59.039A, S59.039D, S59.039G, S59.039K, S59.039P,

S59.039S, S59.041A, S59.041D, S59.041G, S59.041K, S59.041P, S59.041S, S59.042A, S59.042D, S59.042G, S59.042K, S59.042P, S59.042S, S59.049A, S59.049D, S59.049G, S59.049K, S59.049P, S59.049S, S59.091A, S59.091D, S59.091G, S59.091K, S59.091P, S59.091S, S59.092A, S59.092D, S59.092G, S59.092K, S59.092P, S59.092S, S59.099A, S59.099D, S59.099G, S59.099K, S59.099P, S59.099S, S59.101A, S59.101D, S59.101G, S59.101K, S59.101P, S59.101S, S59.102A, S59.102D, S59.102G, S59.102K, S59.102P, S59.102S, S59.109A, S59.109D, S59.109G, S59.109K, S59.109P, S59.109S, S59.111A, S59.111D, S59.111G, S59.111K, S59.111P, S59.111S, S59.112A, S59.112D, S59.112G, S59.112K, S59.112P, S59.112S, S59.119A, S59.119D, S59.119G, S59.119K, S59.119P, S59.119S, S59.121A, S59.121D, S59.121G, S59.121K, S59.121P, S59.121S, S59.122A, S59.122D, S59.122G, S59.122K, S59.122P, S59.122S, S59.129A, S59.129D, S59.129G, S59.129K, S59.129P, S59.129S, S59.131A, S59.131D, S59.131G, S59.131K, S59.131P, S59.131S, S59.132A, S59.132D, S59.132G, S59.132K, S59.132P, S59.132S, S59.139A, S59.139D, S59.139G, S59.139K, S59.139P, S59.139S, S59.141A, S59.141D, S59.141G, S59.141K, S59.141P, S59.141S, S59.142A, S59.142D, S59.142G, S59.142K, S59.142P, S59.142S, S59.149A, S59.149D, S59.149G, S59.149K, S59.149P, S59.149S, S59.191A, S59.191D, S59.191G, S59.191K, S59.191P, S59.191S, S59.192A, S59.192D, S59.192G, S59.192K, S59.192P, S59.192S, S59.199A, S59.199D, S59.199G, S59.199K, S59.199P, S59.199S, S59.201A, S59.201D, S59.201G, S59.201K, S59.201P, S59.201S, S59.202A, S59.202D, S59.202G, S59.202K, S59.202P, S59.202S, S59.209A, S59.209D, S59.209G, S59.209K, S59.209P, S59.209S, S59.211A, S59.211D, S59.211G, S59.211K, S59.211P, S59.211S, S59.212A, S59.212D, S59.212G, S59.212K, S59.212P, S59.212S, S59.219A, S59.219D, S59.219G, S59.219K, S59.219P, S59.219S, S59.221A, S59.221D, S59.221G, S59.221K, S59.221P, S59.221S, S59.222A, S59.222D, S59.222G, S59.222K, S59.222P, S59.222S, S59.229A, S59.229D, S59.229G, S59.229K, S59.229P, S59.229S, S59.231A, S59.231D, S59.231G, S59.231K, S59.231P, S59.231S, S59.232A, S59.232D, S59.232G, S59.232K, S59.232P, S59.232S, S59.239A, S59.239D, S59.239G, S59.239K, S59.239P, S59.239S, S59.241A, S59.241D, S59.241G, S59.241K, S59.241P, S59.241S, S59.242A, S59.242D, S59.242G, S59.242K, S59.242P, S59.242S, S59.249A, S59.249D, S59.249G, S59.249K, S59.249P, S59.249S, S59.291A, S59.291D, S59.291G, S59.291K, S59.291P, S59.291S, S59.292A, S59.292D, S59.292G, S59.292K, S59.292P, S59.292S, S59.299A, S59.299D, S59.299G, S59.299K, S59.299P, S59.299S, S62.011A, S62.011B, S62.011D, S62.011G, S62.011K, S62.011P, S62.011S, S62.012A, S62.012B, S62.012D, S62.012G, S62.012K, S62.012P, S62.012S, S62.013A, S62.013B, S62.013D, S62.013G, S62.013K, S62.013P, S62.013S, S62.014A, S62.014B, S62.014D, S62.014G, S62.014K, S62.014P, S62.014S, S62.015A, S62.015B, S62.015D, S62.015G, S62.015K, S62.015P, S62.015S, S62.016A, S62.016B, S62.016D, S62.016G, S62.016K, S62.016P, S62.016S, S62.021A, S62.021B, S62.021D, S62.021G, S62.021K, S62.021P, S62.021S, S62.022A, S62.022B, S62.022D, S62.022G, S62.022K, S62.022P, S62.022S, S62.023A, S62.023B, S62.023D, S62.023G, S62.023K, S62.023P, S62.023S, S62.024A, S62.024B, S62.024D, S62.024G, S62.024K, S62.024P, S62.024S, S62.025A, S62.025B, S62.025D, S62.025G, S62.025K, S62.025P, S62.025S, S62.026A, S62.026B, S62.026D, S62.026G, S62.026K, S62.026P, S62.026S, S62.031A, S62.031B, S62.031D, S62.031G, S62.031K, S62.031P, S62.031S, S62.032A, S62.032B, S62.032D, S62.032G, S62.032K, S62.032P, S62.032S, S62.033A, S62.033B, S62.033D, S62.033G, S62.033K, S62.033P, S62.033S, S62.034A, S62.034B, S62.034D, S62.034G, S62.034K, S62.034P, S62.034S, S62.035A, S62.035B, S62.035D,

S62.035G, S62.035K, S62.035P, S62.035S, S62.036A, S62.036B, S62.036D, S62.036G,  
S62.036K, S62.036P, S62.036S, S62.101A, S62.101B, S62.101D, S62.101G, S62.101K,  
S62.101P, S62.101S, S62.102A, S62.102B, S62.102D, S62.102G, S62.102K, S62.102P,  
S62.102S, S62.109A, S62.109B, S62.109D, S62.109G, S62.109K, S62.109P, S62.109S,  
S62.111A, S62.111B, S62.111D, S62.111G, S62.111K, S62.111P, S62.111S, S62.112A,  
S62.112B, S62.112D, S62.112G, S62.112K, S62.112P, S62.112S, S62.113A, S62.113B,  
S62.113D, S62.113G, S62.113K, S62.113P, S62.113S, S62.114A, S62.114B, S62.114D,  
S62.114G, S62.114K, S62.114P, S62.114S, S62.115A, S62.115B, S62.115D, S62.115G,  
S62.115K, S62.115P, S62.115S, S62.116A, S62.116B, S62.116D, S62.116G, S62.116K,  
S62.116P, S62.116S, S62.121A, S62.121B, S62.121D, S62.121G, S62.121K, S62.121P,  
S62.121S, S62.122A, S62.122B, S62.122D, S62.122G, S62.122K, S62.122P, S62.122S,  
S62.123A, S62.123B, S62.123D, S62.123G, S62.123K, S62.123P, S62.123S, S62.124A,  
S62.124B, S62.124D, S62.124G, S62.124K, S62.124P, S62.124S, S62.125A, S62.125B,  
S62.125D, S62.125G, S62.125K, S62.125P, S62.125S, S62.126A, S62.126B, S62.126D,  
S62.126G, S62.126K, S62.126P, S62.126S, S62.131A, S62.131B, S62.131D, S62.131G,  
S62.131K, S62.131P, S62.131S, S62.132A, S62.132B, S62.132D, S62.132G, S62.132K,  
S62.132P, S62.132S, S62.133A, S62.133B, S62.133D, S62.133G, S62.133K, S62.133P,  
S62.133S, S62.134A, S62.134B, S62.134D, S62.134G, S62.134K, S62.134P, S62.134S,  
S62.135A, S62.135B, S62.135D, S62.135G, S62.135K, S62.135P, S62.135S, S62.136A,  
S62.136B, S62.136D, S62.136G, S62.136K, S62.136P, S62.136S, S62.141A, S62.141B,  
S62.141D, S62.141G, S62.141K, S62.141P, S62.141S, S62.142A, S62.142B, S62.142D,  
S62.142G, S62.142K, S62.142P, S62.142S, S62.143A, S62.143B, S62.143D, S62.143G,  
S62.143K, S62.143P, S62.143S, S62.144A, S62.144B, S62.144D, S62.144G, S62.144K,  
S62.144P, S62.144S, S62.145A, S62.145B, S62.145D, S62.145G, S62.145K, S62.145P,  
S62.145S, S62.146A, S62.146B, S62.146D, S62.146G, S62.146K, S62.146P, S62.146S,  
S62.151A, S62.151B, S62.151D, S62.151G, S62.151K, S62.151P, S62.151S, S62.152A,  
S62.152B, S62.152D, S62.152G, S62.152K, S62.152P, S62.152S, S62.153A, S62.153B,  
S62.153D, S62.153G, S62.153K, S62.153P, S62.153S, S62.154A, S62.154B, S62.154D,  
S62.154G, S62.154K, S62.154P, S62.154S, S62.155A, S62.155B, S62.155D, S62.155G,  
S62.155K, S62.155P, S62.155S, S62.156A, S62.156B, S62.156D, S62.156G, S62.156K,  
S62.156P, S62.156S, S62.161A, S62.161B, S62.161D, S62.161G, S62.161K, S62.161P,  
S62.161S, S62.162A, S62.162B, S62.162D, S62.162G, S62.162K, S62.162P, S62.162S,  
S62.163A, S62.163B, S62.163D, S62.163G, S62.163K, S62.163P, S62.163S, S62.164A,  
S62.164B, S62.164D, S62.164G, S62.164K, S62.164P, S62.164S, S62.165A, S62.165B,  
S62.165D, S62.165G, S62.165K, S62.165P, S62.165S, S62.166A, S62.166B, S62.166D,  
S62.166G, S62.166K, S62.166P, S62.166S, S62.171A, S62.171B, S62.171D, S62.171G,  
S62.171K, S62.171P, S62.171S, S62.172A, S62.172B, S62.172D, S62.172G, S62.172K,  
S62.172P, S62.172S, S62.173A, S62.173B, S62.173D, S62.173G, S62.173K, S62.173P,  
S62.173S, S62.174A, S62.174B, S62.174D, S62.174G, S62.174K, S62.174P, S62.174S,  
S62.175A, S62.175B, S62.175D, S62.175G, S62.175K, S62.175P, S62.175S, S62.176A,  
S62.176B, S62.176D, S62.176G, S62.176K, S62.176P, S62.176S, S62.181A, S62.181B,  
S62.181D, S62.181G, S62.181K, S62.181P, S62.181S, S62.182A, S62.182B, S62.182D,  
S62.182G, S62.182K, S62.182P, S62.182S, S62.183A, S62.183B, S62.183D, S62.183G,  
S62.183K, S62.183P, S62.183S, S62.184A, S62.184B, S62.184D, S62.184G, S62.184K,  
S62.184P, S62.184S, S62.185A, S62.185B, S62.185D, S62.185G, S62.185K, S62.185P,  
S62.185S, S62.186A, S62.186B, S62.186D, S62.186G, S62.186K, S62.186P, S62.186S,

S62.90XA, S62.90XB, S62.90XD, S62.90XG, S62.90XK, S62.90XP, S62.90XS, S62.91XA, S62.91XB, S62.91XD, S62.91XG, S62.91XK, S62.91XP, S62.91XS, S62.92XA, S62.92XB, S62.92XD, S62.92XG, S62.92XK, S62.92XP, S62.92XS

- *Note: CMS does not include this category of fractures in their CCW Conditions Algorithm. We selected these codes manually from complete ICD-10 tables using the same principles we applied above*
- *Abbreviated list of ICD-10 diagnosis codes: M80.03\*\*, M80.83\*\*, M84.33\*\*, M84.43\*\*, M84.53\*\*, M84.63\*\*, S52.\*\*\*\*, S59.0\*\*\* through S59.2\*\*\*, S62.01\*\* through S62.18\*\*, S62.9\*\*\*\**

- Valid ICD-10 procedure codes: OPS.H04Z, OPS.H05Z, OPS.H06Z, OPS.H0BZ, OPS.H0CZ, OPS.H0DZ, OPS.H0ZZ, OPS.H34Z, OPS.H35Z, OPS.H36Z, OPS.H3BZ, OPS.H3CZ, OPS.H3DZ, OPS.H3ZZ, OPS.H44Z, OPS.H45Z, OPS.H46Z, OPS.H4BZ, OPS.H4CZ, OPS.H4DZ, OPS.H4ZZ, OPS.HXZZ, OPS.J04Z, OPS.J05Z, OPS.J06Z, OPS.J0BZ, OPS.J0CZ, OPS.J0DZ, OPS.J0ZZ, OPS.J34Z, OPS.J35Z, OPS.J36Z, OPS.J3BZ, OPS.J3CZ, OPS.J3DZ, OPS.J3ZZ, OPS.J44Z, OPS.J45Z, OPS.J46Z, OPS.J4BZ, OPS.J4CZ, OPS.J4DZ, OPS.J4ZZ, OPS.JXZZ, OPS.K04Z, OPS.K05Z, OPS.K06Z, OPS.K0BZ, OPS.K0CZ, OPS.K0DZ, OPS.K0ZZ, OPS.K34Z, OPS.K35Z, OPS.K36Z, OPS.K3BZ, OPS.K3CZ, OPS.K3DZ, OPS.K3ZZ, OPS.K44Z, OPS.K45Z, OPS.K46Z, OPS.K4BZ, OPS.K4CZ, OPS.K4DZ, OPS.K4ZZ, OPS.KXZZ, OPS.L04Z, OPS.L05Z, OPS.L06Z, OPS.L0BZ, OPS.L0CZ, OPS.L0DZ, OPS.L0ZZ, OPS.L34Z, OPS.L35Z, OPS.L36Z, OPS.L3BZ, OPS.L3CZ, OPS.L3DZ, OPS.L3ZZ, OPS.L44Z, OPS.L45Z, OPS.L46Z, OPS.L4BZ, OPS.L4CZ, OPS.L4DZ, OPS.L4ZZ, OPS.LXZZ, OPS.M04Z, OPS.M05Z, OPS.M0ZZ, OPS.M34Z, OPS.M35Z, OPS.M3ZZ, OPS.M44Z, OPS.M45Z, OPS.M4ZZ, OPS.MXZZ, OPS.N04Z, OPS.N05Z, OPS.N0ZZ, OPS.N34Z, OPS.N35Z, OPS.N3ZZ, OPS.N44Z, OPS.N45Z, OPS.N4ZZ, OPS.NXZZ, ORS.N04Z, ORS.N05Z, ORS.N0ZZ, ORS.N34Z, ORS.N35Z, ORS.N3ZZ, ORS.N44Z, ORS.N45Z, ORS.N4ZZ, ORS.NX4Z, ORS.NX5Z, ORS.NXZZ, OPS.P04Z, OPS.P05Z, OPS.P0ZZ, OPS.P34Z, OPS.P35Z, OPS.P3ZZ, OPS.P44Z, OPS.P45Z, OPS.P4ZZ, OPS.PX4Z, OPS.PX5Z, OPS.PXZZ, OPS.Q04Z, OPS.Q05Z, OPS.Q0ZZ, OPS.Q34Z, OPS.Q35Z, OPS.Q3ZZ, OPS.Q44Z, OPS.Q45Z, OPS.Q4ZZ, OPS.QX4Z, OPS.QX5Z, OPS.QXZZ, OPS.R04Z, OPS.R05Z, OPS.R0ZZ, OPS.R34Z, OPS.R35Z, OPS.R3ZZ, OPS.R44Z, OPS.R45Z, OPS.R4ZZ, OPS.RX4Z, OPS.RX5Z, OPS.RXZZ
- *Abbreviated list of ICD-10 procedure codes: OPS.H\*\*\*, OPS.J\*\*\*, OPS.K\*\*\*, OPS.L\*\*\*, OPS.M\*\*\*, OPS.N\*\*\*, ORS.N\*\*\*, ORS.P\*\*\*, ORS.Q\*\*\*, ORS.R\*\*\**

CCW, Chronic Conditions Data Warehouse; CMS, Centers for Medicare and Medicaid Services; CPT, Current Procedural Terminology; ICD-9, International Classification of Diseases, 9th Revision; ICD-10, International Classification of Diseases, 10th Revision.

## References

1. Center for Medicare and Medicaid Services Chronic Conditions Data Warehouse. CMS Chronic Conditions Data Warehouse (CCW) CCW Condition Algorithms. Updated July 2016. Available at: <https://www.ccwdata.org/web/guest/condition-categories>. Accessed 3

October 2016.

2. Cheng H, Gary LC, Curtis JR, et al. Estimated prevalence and patterns of presumed osteoporosis among older Americans based on Medicare data. *Osteoporos Int*. 2009;20:1507–1515.
3. Krupski TL, Smith MR, Chan Lee W, et al. Natural history of bone complications in men with prostate carcinoma initiating androgen deprivation therapy. *Cancer*. 2004;101:541–549.
4. Shahinian VB, Kuo YF, Freeman JL, et al. Risk of fracture after androgen deprivation for prostate cancer. *N Engl J Med*. 2005;352:154–164.
5. Baxter NN, Habermann EB, Tepper JE, et al. Risk of pelvic fractures in older women following pelvic irradiation. *JAMA*. 2005;294:2587–2593.

**TABLE 3.** Covariate Definitions and Codes

| <b>Covariate</b>       | <b>Description</b>                                                                                                                                                                                                                                   | <b>Medications</b> | <b>ICD-9<br/>Diagnosis</b>                                                                                                                                                 | <b>ICD-9<br/>Procedure</b> | <b>ICD-10<br/>Diagnosis</b>                                                                                                                                                      | <b>ICD-10<br/>Procedure</b> | <b>CPT-4</b> |
|------------------------|------------------------------------------------------------------------------------------------------------------------------------------------------------------------------------------------------------------------------------------------------|--------------------|----------------------------------------------------------------------------------------------------------------------------------------------------------------------------|----------------------------|----------------------------------------------------------------------------------------------------------------------------------------------------------------------------------|-----------------------------|--------------|
| Age                    | A numeric variable of the patient's age, in years, at index date                                                                                                                                                                                     |                    |                                                                                                                                                                            |                            |                                                                                                                                                                                  |                             |              |
| Male                   | Male patients. If there are discrepancies during the study period, this will be defined as the mode for all observations                                                                                                                             |                    |                                                                                                                                                                            |                            |                                                                                                                                                                                  |                             |              |
| Married                | An indicator variable identifying the patient as married as of the index date                                                                                                                                                                        |                    |                                                                                                                                                                            |                            |                                                                                                                                                                                  |                             |              |
| Race                   | The patient's race. The value for race will be defined as Caucasian, black, Hispanic, Asian, or other. Race observations will be taken throughout the entire study period and, if there are discrepancies, the mode of all observations will be used |                    |                                                                                                                                                                            |                            |                                                                                                                                                                                  |                             |              |
| CD4 count              | A numeric variable representing the patient's most proximal CD4 count on or before the index date                                                                                                                                                    |                    |                                                                                                                                                                            |                            |                                                                                                                                                                                  |                             |              |
| Viral load             | A numeric variable representing the patient's most proximal HIV viral load on or before the index date                                                                                                                                               |                    |                                                                                                                                                                            |                            |                                                                                                                                                                                  |                             |              |
| Chronic kidney disease | Dichotomous variable indicating whether the patient had evidence of chronic kidney disease in the pre-index period from inpatient and outpatient records                                                                                             |                    | 016.0*, 095.4,<br>189.0, 190.0,<br>223.0, 223.9,<br>236.9*, 249.4*,<br>250.4*, 271.4,<br>274.10, 283.11,<br>403.**, 404.**,<br>440.1, 442.1,<br>572.4, 580.*–<br>588.* and |                            | A18.11, A52.74,<br>B52.0, C64.*,<br>C68.9, D30.0*,<br>D30.9, D41.0*,<br>D41.9, D59.3,<br>E08.2*, E09.2*,<br>E10.2*, E11.2*,<br>E13.2*, I12.*,<br>I13.0, E13.1*,<br>E13.2, I70.1, |                             |              |



| Covariate                                  | Description                                                                                                                                                                     | Medications | ICD-9<br>Diagnosis                                        | ICD-9<br>Procedure | ICD-10<br>Diagnosis                                                                                                                                                                                                                                                                                                               | ICD-10<br>Procedure | CPT-4 |
|--------------------------------------------|---------------------------------------------------------------------------------------------------------------------------------------------------------------------------------|-------------|-----------------------------------------------------------|--------------------|-----------------------------------------------------------------------------------------------------------------------------------------------------------------------------------------------------------------------------------------------------------------------------------------------------------------------------------|---------------------|-------|
|                                            |                                                                                                                                                                                 |             | 580.**-588.**,<br>591, 753.12-<br>753.29, 794.4,<br>V42.0 |                    | I72.2, K76.7,<br>M10.30,<br>M10.31*-,<br>M10.37*,<br>M10.3*,<br>M32.14,<br>M32.15,<br>M35.04, N0*.*,<br>N08, N13.1,<br>N13.2, N13.3*,<br>N14.*, N15.*,<br>N16, N17.*,<br>N18.*, N19,<br>N25.0, N25.1,<br>N25.8*, N25.9,<br>N26.1, Q61.02,<br>Q61.1*, Q61.2-<br>Q61.8, Q62.0,<br>Q62.1*, Q62.0,<br>Q62.1*, Q62.2,<br>Q62.3*, R94.4 |                     |       |
| eGFR                                       | A numeric variable representing the patient's most proximal eGFR on or before the index date                                                                                    |             |                                                           |                    |                                                                                                                                                                                                                                                                                                                                   |                     |       |
| Cardiovascular and cerebrovascular disease | Dichotomous variable indicating whether the patient had diagnosis of a cardiovascular or cerebrovascular disorder in the pre-index period from inpatient and outpatient records |             | 410*-414*,<br>430*-438*,<br>440*-448*                     |                    | I20*-I25*,<br>I60*-I69*                                                                                                                                                                                                                                                                                                           |                     |       |
| Heart failure                              | Dichotomous variable indicating whether the patient had diagnosis of congestive heart failure in the pre-index period from inpatient and outpatient records                     |             | 398.91, 402.*1,<br>404.*1, 404.*3,<br>428.*, 428.**       |                    | I09.8*, I11.0,<br>I13.0, I13.2,<br>I50.*, I50.**                                                                                                                                                                                                                                                                                  |                     |       |
| Dyslipidemia diagnosis                     | Dichotomous variable indicating whether the patient had evidence of dyslipidemia in                                                                                             |             | 272.4                                                     |                    | E78.0, E78.4,<br>E78.5                                                                                                                                                                                                                                                                                                            |                     |       |

| Covariate                   | Description                                                                                                                                               | Medications | ICD-9<br>Diagnosis                                                                                               | ICD-9<br>Procedure                                                | ICD-10<br>Diagnosis                                                                                                                                                                                       | ICD-10<br>Procedure                                                                                                                                                                                           | CPT-4                                         |
|-----------------------------|-----------------------------------------------------------------------------------------------------------------------------------------------------------|-------------|------------------------------------------------------------------------------------------------------------------|-------------------------------------------------------------------|-----------------------------------------------------------------------------------------------------------------------------------------------------------------------------------------------------------|---------------------------------------------------------------------------------------------------------------------------------------------------------------------------------------------------------------|-----------------------------------------------|
|                             | the pre-index period from inpatient and outpatient records                                                                                                |             |                                                                                                                  |                                                                   |                                                                                                                                                                                                           |                                                                                                                                                                                                               |                                               |
| Hypertension diagnosis      | Dichotomous variable indicating whether the patient had evidence of hypertension in the pre-index period from inpatient and outpatient records            |             | 401*, 402*, 403*, 404*, 405*                                                                                     |                                                                   | I10*, I11*, I12*, I13*, I15*                                                                                                                                                                              |                                                                                                                                                                                                               |                                               |
| Diabetes mellitus diagnosis | Dichotomous variable indicating whether the patient had evidence of diabetes in the pre-index period from inpatient and outpatient visits                 |             | 249**, 250**, 357.2, 362.0*, 366.41                                                                              |                                                                   | E10*, E11*, E13*, E14*                                                                                                                                                                                    |                                                                                                                                                                                                               |                                               |
| End-stage renal disease     | Dichotomous variable indicating whether the patient had diagnosis of end-stage renal disease in the pre-index period from inpatient and outpatient visits |             | 585.6, 403.*1, 404.*2, 404.*3, V42.0, V45.1*, 458.21, 792.5, 996.56, 996.68, 996.73, E87.91, V456, V43.0, 996.81 | 39.951, 54.981, 55.6*, 38.95, 39.27, 39.42, 39.43, 39.95*, 54.98* | I12.0, I13.11, I13.2, N18.6, N18.5, T81.502*, T81.512*, T81.522*, T81.532*, T81.592*, T82.4*, T85.611*, T85.621*, T85.631*, T85.691*, T85.698*, Z49.0*, I95.3, R88.0, Y84.1, Z99.2, T86.1*, Z48.22, Z94.0 | 0TT00ZZ, 0TT04ZZ, 0TT10ZZ, 0TT14ZZ, 0TT60ZZ, 0TT64ZZ, 0TT67ZZ, 0TT68ZZ, 0TT70ZZ, 0TT74ZZ, 0TT77ZZ, 0TT78ZZ, 0TT20ZZ, 0TT24ZZ, 0TT00ZZ, 0TS00ZZ, 0TS10ZZ, 0TY00Z0, 0TY00Z1, 0TY00Z2, 0TY10Z0, 0TY10Z1, 0TY10Z2 | 90935–90999, 08658, 76776, 76778, 50360–50380 |
| Viral hepatitis             | Dichotomous variable indicating whether                                                                                                                   |             | 70.0*–70.9*                                                                                                      |                                                                   | B15*–B19*                                                                                                                                                                                                 |                                                                                                                                                                                                               |                                               |

| Covariate            | Description                                                                                                                                                                                                      | Medications | ICD-9<br>Diagnosis                                                                                                                                                  | ICD-9<br>Procedure | ICD-10<br>Diagnosis                                                                           | ICD-10<br>Procedure | CPT-4 |
|----------------------|------------------------------------------------------------------------------------------------------------------------------------------------------------------------------------------------------------------|-------------|---------------------------------------------------------------------------------------------------------------------------------------------------------------------|--------------------|-----------------------------------------------------------------------------------------------|---------------------|-------|
| diagnosis            | the patient had evidence of viral hepatitis from inpatient and outpatient records                                                                                                                                |             |                                                                                                                                                                     |                    |                                                                                               |                     |       |
| Tuberculosis         | Dichotomous variable indicating whether the patient had evidence of tuberculosis from inpatient and outpatient records                                                                                           |             | 010*-018*                                                                                                                                                           |                    | A15*, A19*                                                                                    |                     |       |
| Psychiatric disorder | Dichotomous variable indicating whether the patient had evidence of a diagnosis of schizophrenia, psychosis, bipolar or major depression, or posttraumatic stress disorder from inpatient and outpatient records |             | 295*, V11.0,<br>293*, 294*,<br>298*, 299*,<br>296*, V11.1,<br>309.81                                                                                                |                    | F20*, F06*,<br>F28*, F23*,<br>F29*, F84*,<br>F30, Z65.8*,<br>F43.1, F43.10,<br>F43.11, F43.12 |                     |       |
| Bone disease         | Dichotomous variable indicating whether the patient had evidence of osteoporosis from inpatient and outpatient records.                                                                                          |             | 733.0*                                                                                                                                                              |                    | M81*, M80*                                                                                    |                     |       |
| Tobacco              | Dichotomous variable indicating of whether the patient had evidence of tobacco use in the pre-index period from inpatient and outpatient records                                                                 |             | 305.1, 649.0*,<br>989.84, V15.82                                                                                                                                    |                    | F17.2*, T65.2*,<br>O99.33*, Z50.8,<br>Z72.0, Z87.891                                          |                     |       |
| Alcohol abuse        | Dichotomous variable indicating whether the patient had an alcohol abuse disorder in the pre-index period from inpatient and outpatient records                                                                  |             | 291**, 303**,<br>305.0*, 357.5,<br>425.5, 535.3*,<br>571.0, 571.1,<br>571.2, 571.3,<br>790.3, 980.0,<br>980.9, E860,<br>E860.0, E860.1,<br>E860.8, E860.9,<br>V11.3 |                    | F10*, Z71.4,Z                                                                                 |                     |       |
| Body mass index      | The patient's body mass index on or before the index date. This variable will be calculated from height and weight observations in the CDW vital status file. The most proximal valid observation for            |             |                                                                                                                                                                     |                    |                                                                                               |                     |       |

| Covariate             | Description                                                                                                                                                                                                                                                                                                                                                                                                                     | Medications                                                                        | ICD-9<br>Diagnosis | ICD-9<br>Procedure | ICD-10<br>Diagnosis | ICD-10<br>Procedure | CPT-4 |
|-----------------------|---------------------------------------------------------------------------------------------------------------------------------------------------------------------------------------------------------------------------------------------------------------------------------------------------------------------------------------------------------------------------------------------------------------------------------|------------------------------------------------------------------------------------|--------------------|--------------------|---------------------|---------------------|-------|
|                       | height or weight on or before the index date will be identified as any value that is within 3 standard deviations of the mean of all heights and weights for the cohort. For patients without observations within 3 standard deviations of the mean, other values will be accepted as valid if (a) for height, there are at least 2 identical observations or (b) for weight, there are at least 2 observations within 5 pounds |                                                                                    |                    |                    |                     |                     |       |
| Methadone             | Dichotomous variable indicating whether the patient had evidence of methadone treatment in the pre-index period based on CDW pharmacy records of relevant medications                                                                                                                                                                                                                                                           | Methadone                                                                          |                    |                    |                     |                     |       |
| Proton pump inhibitor | Dichotomous variable indicating whether the patient had evidence of proton pump inhibitor treatment in the pre-index period based on CDW pharmacy records of relevant medications                                                                                                                                                                                                                                               | Dexlansoprazole, esomeprazole, lansoprazole, omeprazole, pantoprazole, rabeprazole |                    |                    |                     |                     |       |
| Bisphosphonate        | Dichotomous variable indicating whether the patient had evidence of bisphosphonate treatment in the pre-index period based on CDW pharmacy records of relevant medications                                                                                                                                                                                                                                                      | Alendronate, ibandronate, risedronate, zoledronic acid                             |                    |                    |                     |                     |       |

CDW, Clinical Data Warehouse; CPT-4, Current Procedural Terminology, 4th Edition; eGFR, estimated glomerular filtration rate; ICD-9, International Classification of Diseases, 9th Revision; ICD-10, International Classification of Diseases, 10th Revision.

**TABLE 4. Baseline Covariate Balance: SMDs Before and After Weighting**

|                                                    | Unweighted SMDs – EFV vs |        |        |                | Weighted SMDs* – EFV vs |        |        |                |
|----------------------------------------------------|--------------------------|--------|--------|----------------|-------------------------|--------|--------|----------------|
|                                                    | All Non-EFV              | EVG/c  | RPV    | RTV-Boosted PI | All Non-EFV             | EVG/c  | RPV    | RTV-Boosted PI |
| <b>Demographics and physical</b>                   |                          |        |        |                |                         |        |        |                |
| Age, years                                         | 0.095                    | 0.12   | 0.277  | 0.081          | 0.007                   | -0.034 | -0.118 | 0.004          |
| Male                                               | 0.04                     | 0.082  | 0.143  | 0.03           | 0.001                   | -0.038 | -0.06  | -0.001         |
| Married                                            | 0.031                    | -0.111 | -0.129 | 0.056          | -0.001                  | -0.019 | 0.065  | -0.001         |
| Race                                               |                          |        |        |                |                         |        |        |                |
| White                                              | -0.003                   | -0.033 | 0.042  | -0.004         | 0                       | -0.027 | -0.071 | 0              |
| African American                                   | 0.04                     | 0.139  | -0.012 | 0.035          | 0.002                   | 0.035  | 0.044  | 0.001          |
| Hispanic                                           | -0.023                   | -0.078 | 0.018  | -0.021         | -0.003                  | -0.013 | -0.008 | -0.002         |
| Asian                                              | -0.011                   | -0.142 | -0.038 | 0.002          | 0.006                   | 0.014  | 0.057  | 0.002          |
| Other                                              | -0.047                   | -0.045 | -0.086 | -0.047         | -0.005                  | -0.029 | 0.042  | -0.003         |
| Missing                                            | -0.049                   | -0.117 | -0.053 | -0.044         | -0.001                  | 0.001  | 0.058  | -0.002         |
| Body mass index, kg/m <sup>2</sup>                 | 0.042                    | -0.055 | -0.275 | 0.072          | -0.002                  | 0.036  | -0.074 | 0.002          |
| <b>Pre-index<sup>†</sup> prognostic indices</b>    |                          |        |        |                |                         |        |        |                |
| <b>CD4<sup>+</sup> count, cells/mm<sup>3</sup></b> |                          |        |        |                |                         |        |        |                |
| <200                                               | -0.114                   | 0.113  | 0.384  | -0.166         | 0                       | -0.028 | -0.047 | -0.001         |
| 200–299                                            | 0.03                     | 0.071  | -0.018 | 0.029          | 0.002                   | 0.054  | 0.058  | 0.005          |
| 300–399                                            | 0.117                    | 0.019  | 0.249  | 0.116          | -0.003                  | -0.011 | -0.037 | -0.003         |
| 400–499                                            | 0.084                    | -0.022 | -0.32  | 0.123          | 0                       | 0.016  | 0.076  | 0              |
| ≥500                                               | 0.004                    | -0.341 | -0.637 | 0.08           | 0.001                   | -0.011 | -0.016 | 0.001          |
| Missing                                            | -0.064                   | 0.126  | 0.193  | -0.096         | -0.001                  | -0.01  | -0.002 | -0.002         |
| <b>HIV viral load, copies/mL</b>                   |                          |        |        |                |                         |        |        |                |
| <10,000                                            | -0.061                   | 0.013  | -0.246 | -0.056         | -0.002                  | 0.063  | 0.01   | -0.003         |
| 10,000–100,000                                     | 0.076                    | 0.022  | -0.095 | 0.092          | 0.005                   | 0.02   | 0.118  | 0.005          |
| >100,000                                           | -0.015                   | -0.101 | 0.324  | -0.029         | -0.001                  | -0.022 | -0.115 | 0.002          |
| Missing                                            | -0.005                   | 0.073  | 0.067  | -0.016         | -0.003                  | -0.076 | -0.023 | -0.006         |
| <b>Pre-index<sup>†</sup> renal function</b>        |                          |        |        |                |                         |        |        |                |
| <b>eGFR, mL/min/1.73 m<sup>2</sup></b>             |                          |        |        |                |                         |        |        |                |
| ≥90                                                | 0.034                    | -0.173 | -0.204 | 0.068          | -0.003                  | -0.02  | -0.037 | -0.005         |
| 60–89                                              | 0.006                    | 0.03   | 0.028  | 0.003          | 0                       | 0.038  | 0.027  | 0.004          |
| 30–59                                              | -0.005                   | 0.139  | 0.084  | -0.023         | 0.002                   | -0.05  | 0.086  | 0.002          |
| 15–29                                              | -0.027                   | 0.036  | 0.035  | -0.035         | -0.002                  | 0.034  | 0.034  | -0.002         |
| <15                                                | -0.072                   | 0.1    | 0.1    | -0.093         | 0.004                   | 0.095  | 0.096  | 0.003          |
| Missing                                            | -0.033                   | 0.122  | 0.217  | -0.061         | 0.002                   | -0.015 | -0.052 | 0              |
| <b>Pre-index<sup>†</sup> comorbid diagnoses</b>    |                          |        |        |                |                         |        |        |                |
| CAD/CVD                                            | 0.051                    | -0.041 | 0.104  | 0.056          | 0.004                   | -0.034 | -0.145 | 0.003          |
| Heart failure                                      | 0.07                     | 0.059  | 0.116  | 0.067          | 0                       | 0.077  | 0.049  | -0.002         |
| Dyslipidemia                                       | 0.065                    | -0.153 | -0.028 | 0.091          | 0.002                   | -0.002 | -0.051 | 0.003          |
| Hypertension                                       | 0.141                    | 0.021  | -0.014 | 0.162          | 0.005                   | 0      | 0.038  | 0.003          |
| Diabetes mellitus                                  | 0.051                    | 0.018  | 0.072  | 0.053          | 0.001                   | 0.017  | -0.08  | -0.001         |
| Chronic kidney disease                             | 0.05                     | -0.004 | 0.061  | 0.053          | 0.001                   | -0.031 | 0.121  | -0.001         |
| End-stage renal disease                            | -0.006                   | -0.011 | 0.062  | -0.009         | 0.012                   | 0.006  | 0.059  | 0.002          |
| Viral hepatitis                                    | -0.06                    | 0.038  | 0.058  | -0.076         | -0.001                  | 0.002  | -0.029 | -0.001         |

|                              |        |        |        |        |        |        |        |        |
|------------------------------|--------|--------|--------|--------|--------|--------|--------|--------|
| Tuberculosis                 | -0.023 | 0.075  | 0.008  | -0.033 | -0.002 | 0.031  | 0      | -0.002 |
| Psychiatric disorder         | -0.197 | -0.315 | -0.513 | -0.168 | 0      | 0.015  | 0.033  | -0.002 |
| Depression                   | -0.133 | -0.294 | -0.388 | -0.104 | 0      | 0.017  | -0.03  | -0.004 |
| Schizophrenia                | -0.144 | -0.098 | -0.103 | -0.153 | 0      | 0.033  | -0.01  | 0      |
| Bipolar disorder             | -0.159 | -0.3   | -0.587 | -0.123 | -0.002 | 0.023  | 0.102  | -0.001 |
| Psychosis                    | -0.175 | -0.239 | -0.212 | -0.173 | -0.001 | -0.003 | 0.02   | 0      |
| PTSD                         | -0.121 | -0.275 | -0.736 | -0.072 | 0.002  | 0.003  | 0.039  | 0      |
| Tobacco use                  | 0.012  | 0.016  | -0.304 | 0.033  | 0      | 0.012  | -0.086 | -0.003 |
| Alcohol abuse                | -0.026 | -0.061 | -0.165 | -0.014 | 0.001  | 0.009  | -0.128 | 0.001  |
| <b>Medications</b>           |        |        |        |        |        |        |        |        |
| Methadone                    | -0.089 | 0.03   | 0.001  | -0.103 | 0.007  | 0.04   | 0.067  | 0.004  |
| Proton pump inhibitors       | 0.112  | 0.097  | 0.336  | 0.097  | 0      | 0.042  | -0.1   | 0      |
| Bisphosphonates              | -0.021 | 0.045  | 0.045  | -0.03  | 0.001  | 0.043  | 0.043  | 0.001  |
| Testosterone (current use)   | 0.008  | -0.114 | 0.017  | 0.019  | 0      | 0.018  | 0.055  | -0.004 |
| Testosterone (pre-index use) | -0.007 |        |        | -0.013 | -0.001 |        |        | -0.001 |
| <b>Index year</b>            |        |        |        |        |        |        |        |        |
| 2004                         | -0.021 |        |        | -0.035 | -0.001 |        |        | -0.001 |
| 2005                         | -0.187 |        |        | -0.245 | 0.001  |        |        | 0.001  |
| 2006                         | -0.05  |        |        | -0.107 | 0.001  |        |        | 0.001  |
| 2007                         | 0.13   |        |        | 0.08   | -0.005 |        |        | -0.005 |
| 2008                         | 0.084  |        |        | 0.033  | 0      |        |        | 0      |
| 2009                         | 0.124  |        |        | 0.077  | 0.001  |        |        | 0.001  |
| 2010                         | 0.128  |        |        | 0.083  | 0.004  |        |        | 0.004  |
| 2011                         | 0.066  |        |        | 0.03   | -0.003 |        |        | -0.003 |
| 2012                         | -0.008 |        |        | 0.006  | 0.001  |        |        | 0.001  |
| 2013                         | -0.075 |        |        | 0.024  | 0      |        |        | 0.002  |
| 2014                         | -0.189 |        |        | 0.001  | -0.003 |        |        | 0      |
| 2015                         | -0.223 |        |        | 0.007  | 0.007  |        |        | -0.001 |

\*Weights were calculated by inverse probability treatment weighting method.

†Pre-index comorbidities and clinical characteristics were identified in the 6–12-month pre-index period.

CAD, coronary artery disease; CVD, cerebrovascular disease; EFV, efavirenz; eGFR, estimated glomerular filtration rate; EVG/c, elvitegravir/cobicistat; PI, protease inhibitor (RTV-boosted atazanavir, lopinavir, or darunavir); PTSD, posttraumatic stress disorder; RPV, rilpivirine; RTV, ritonavir; SMD, standardized mean difference.

**TABLE 5.** Summary by Exposure for Bone Adverse Outcomes

| Primary Outcomes                     | Initial Antiretroviral Therapy Containing TDF/FTC Plus |                        |                    |                  |                                  |
|--------------------------------------|--------------------------------------------------------|------------------------|--------------------|------------------|----------------------------------|
|                                      | EFV<br>(n = 4137)                                      | Non-EFV*<br>(n = 3024) | EVG/c<br>(n = 232) | RPV<br>(n = 171) | RTV-<br>Boosted PI<br>(n = 2621) |
| <b>All bone</b>                      |                                                        |                        |                    |                  |                                  |
| Events                               | 144                                                    | 101                    | 7                  | 6                | 88                               |
| Mean time to event (years)           | 660.64                                                 | 596.04                 | 139.71             | 240.00           | 656.61                           |
| Mean follow-up time (years)          | 1.19                                                   | 0.81                   | 0.61               | 0.80             | 0.83                             |
| Total follow-up time (patient-years) | 4917.00                                                | 2442.78                | 141.41             | 137.19           | 2164.19                          |
| <b>Osteoporosis</b>                  |                                                        |                        |                    |                  |                                  |
| Events                               | 43                                                     | 33                     | 3                  | 1                | 29                               |
| Mean time to event (years)           | 810.86                                                 | 872.91                 | 204.67             | 142.00           | 967.24                           |
| Mean follow-up time (years)          | 1.23                                                   | 0.84                   | 0.62               | 0.82             | 0.86                             |
| Total follow-up time (patient-years) | 5100.34                                                | 2541.98                | 144.42             | 140.96           | 2256.61                          |
| <b>Osteopenia</b>                    |                                                        |                        |                    |                  |                                  |
| Events                               | 81                                                     | 43                     | 5                  | 2                | 36                               |
| Mean time to event (years)           | 776.28                                                 | 750.67                 | 178.00             | 67.50            | 868.17                           |
| Mean follow-up time (years)          | 1.21                                                   | 0.84                   | 0.61               | 0.82             | 0.86                             |
| Total follow-up time (patient-years) | 5000.80                                                | 2529.93                | 142.17             | 140.66           | 2247.10                          |
| <b>Osteoporosis or osteopenia</b>    |                                                        |                        |                    |                  |                                  |
| Events                               | 102                                                    | 62                     | 5                  | 3                | 54                               |
| Mean time to event (years)           | 734.83                                                 | 710.00                 | 178.00             | 92.33            | 793.57                           |
| Mean follow-up time (years)          | 1.20                                                   | 0.83                   | 0.61               | 0.81             | 0.85                             |
| Total follow-up time (patient-years) | 4976.08                                                | 2507.21                | 142.17             | 139.06           | 2225.98                          |
| <b>All fractures</b>                 |                                                        |                        |                    |                  |                                  |
| Events                               | 52                                                     | 46                     | 2                  | 4                | 40                               |
| Mean time to event (years)           | 614.40                                                 | 418.91                 | 44.00              | 326.50           | 446.90                           |
| Mean follow-up time (years)          | 1.23                                                   | 0.83                   | 0.63               | 0.81             | 0.85                             |
| Total follow-up time (patient-years) | 5093.64                                                | 2517.85                | 145.97             | 139.09           | 2232.79                          |
| <b>Vertebral fracture</b>            |                                                        |                        |                    |                  |                                  |
| Events                               | 13                                                     | 12                     | 1                  | 1                | 10                               |
| Mean time to event (years)           | 925.38                                                 | 408.33                 | 23.00              | 143.00           | 473.40                           |
| Mean follow-up time (years)          | 1.24                                                   | 0.85                   | 0.63               | 0.82             | 0.87                             |
| Total follow-up time (patient-years) | 5146.88                                                | 2578.26                | 146.43             | 140.96           | 2290.87                          |
| <b>Hip fracture</b>                  |                                                        |                        |                    |                  |                                  |
| Events                               | 22                                                     | 8                      | 1                  | 2                | 5                                |

|                                      |         |         |        |        |         |
|--------------------------------------|---------|---------|--------|--------|---------|
| Mean time to event (years)           | 558.41  | 412.88  | 23.00  | 257.50 | 553.00  |
| Mean follow-up time (years)          | 1.24    | 0.85    | 0.63   | 0.83   | 0.87    |
| Total follow-up time (patient-years) | 5125.80 | 2574.37 | 146.43 | 142.19 | 2285.75 |

**Wrist/forearm fracture**

|                                      |         |         |        |        |         |
|--------------------------------------|---------|---------|--------|--------|---------|
| Events                               | 21      | 28      | 1      | 1      | 26      |
| Mean time to event (years)           | 522.14  | 396.11  | 65.00  | 648.00 | 399.15  |
| Mean follow-up time (years)          | 1.24    | 0.84    | 0.63   | 0.82   | 0.86    |
| Total follow-up time (patient-years) | 5138.17 | 2535.02 | 146.28 | 141.05 | 2247.70 |

---

\*Non-EFV includes the EVG/c, RPV, and RTV-boosted PI groups.

EFV, efavirenz; EVG/c, elvitegravir/cobicistat; FTC, emtricitabine; PI, protease inhibitor (atazanavir, darunavir, or lopinavir); RPV, rilpivirine; RTV, ritonavir; TDF, tenofovir disoproxil fumarate.



**FIG. 1.**

Baseline demographics: verification that IPT weighting achieves baseline covariate balance between TDF/FTC-containing regimens with EFV versus (A) EVG/c; (B) RTV-boosted PIs; and (C) RPV. CAD/CVD, coronary artery disease/cerebrovascular disease; CKD, chronic kidney disease; EFV, efavirenz; eGFR, estimated glomerular filtration rate; EVG/c, elvitegravir/cobicistat; FTC, emtricitabine; IPT, inverse probability of treatment; PI, protease inhibitor (atazanavir, darunavir, or lopinavir); RPV, rilpivirine; RTV, ritonavir; TDF, tenofovir disoproxil fumarate.

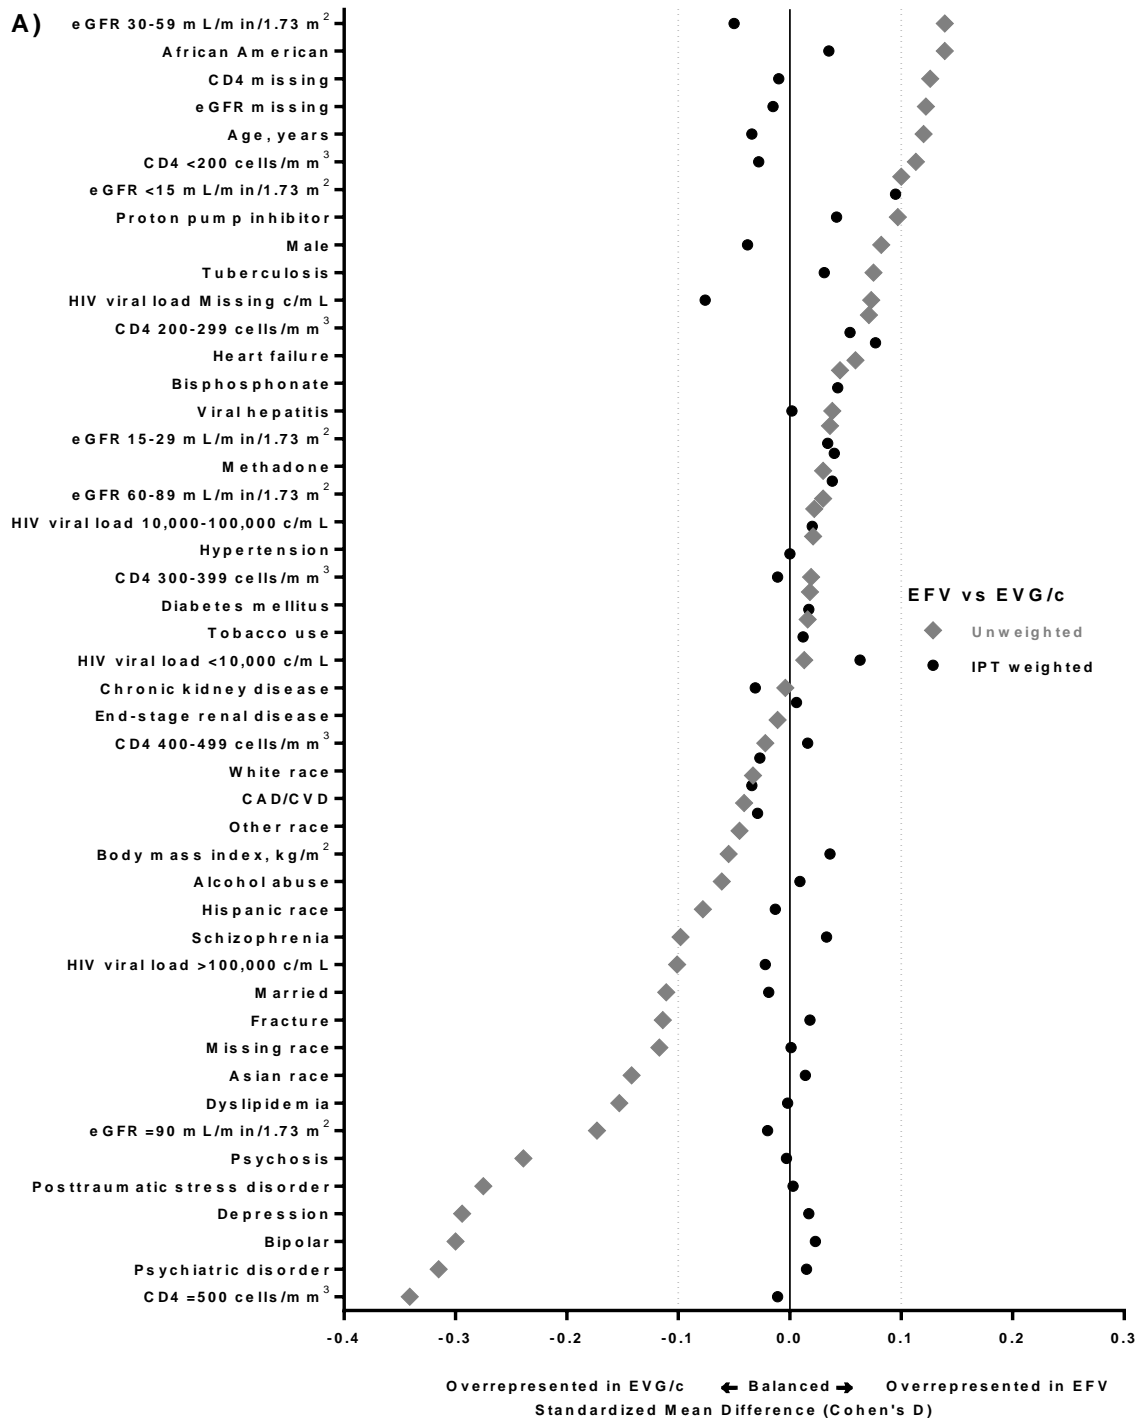

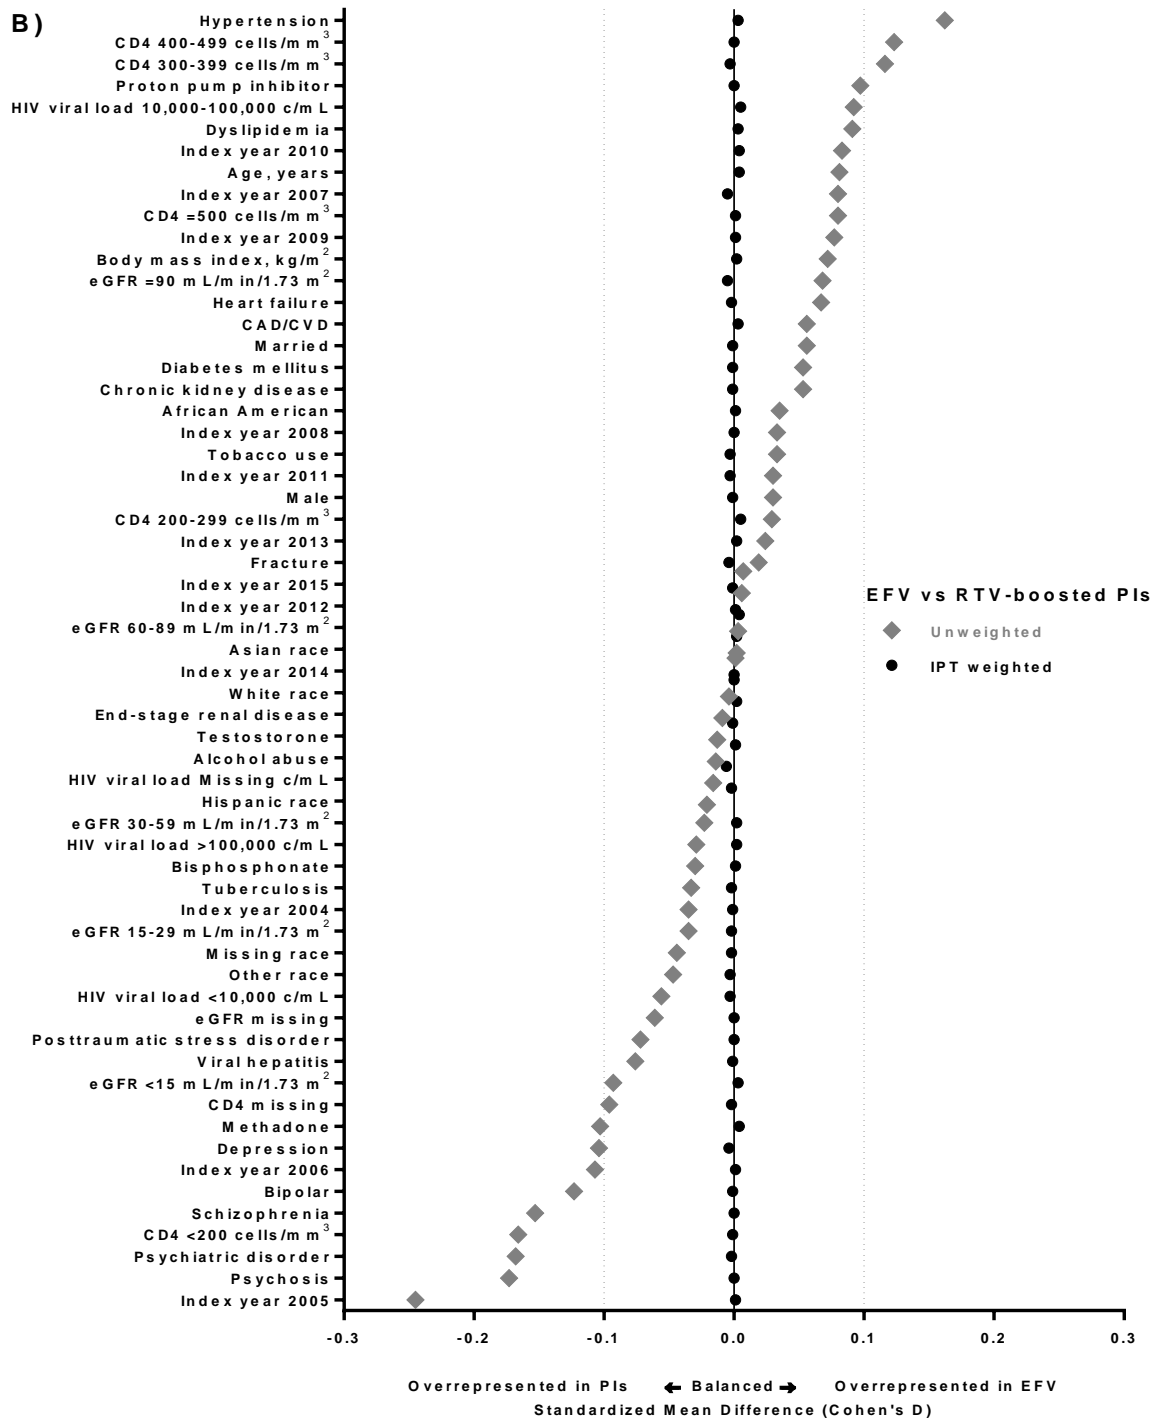

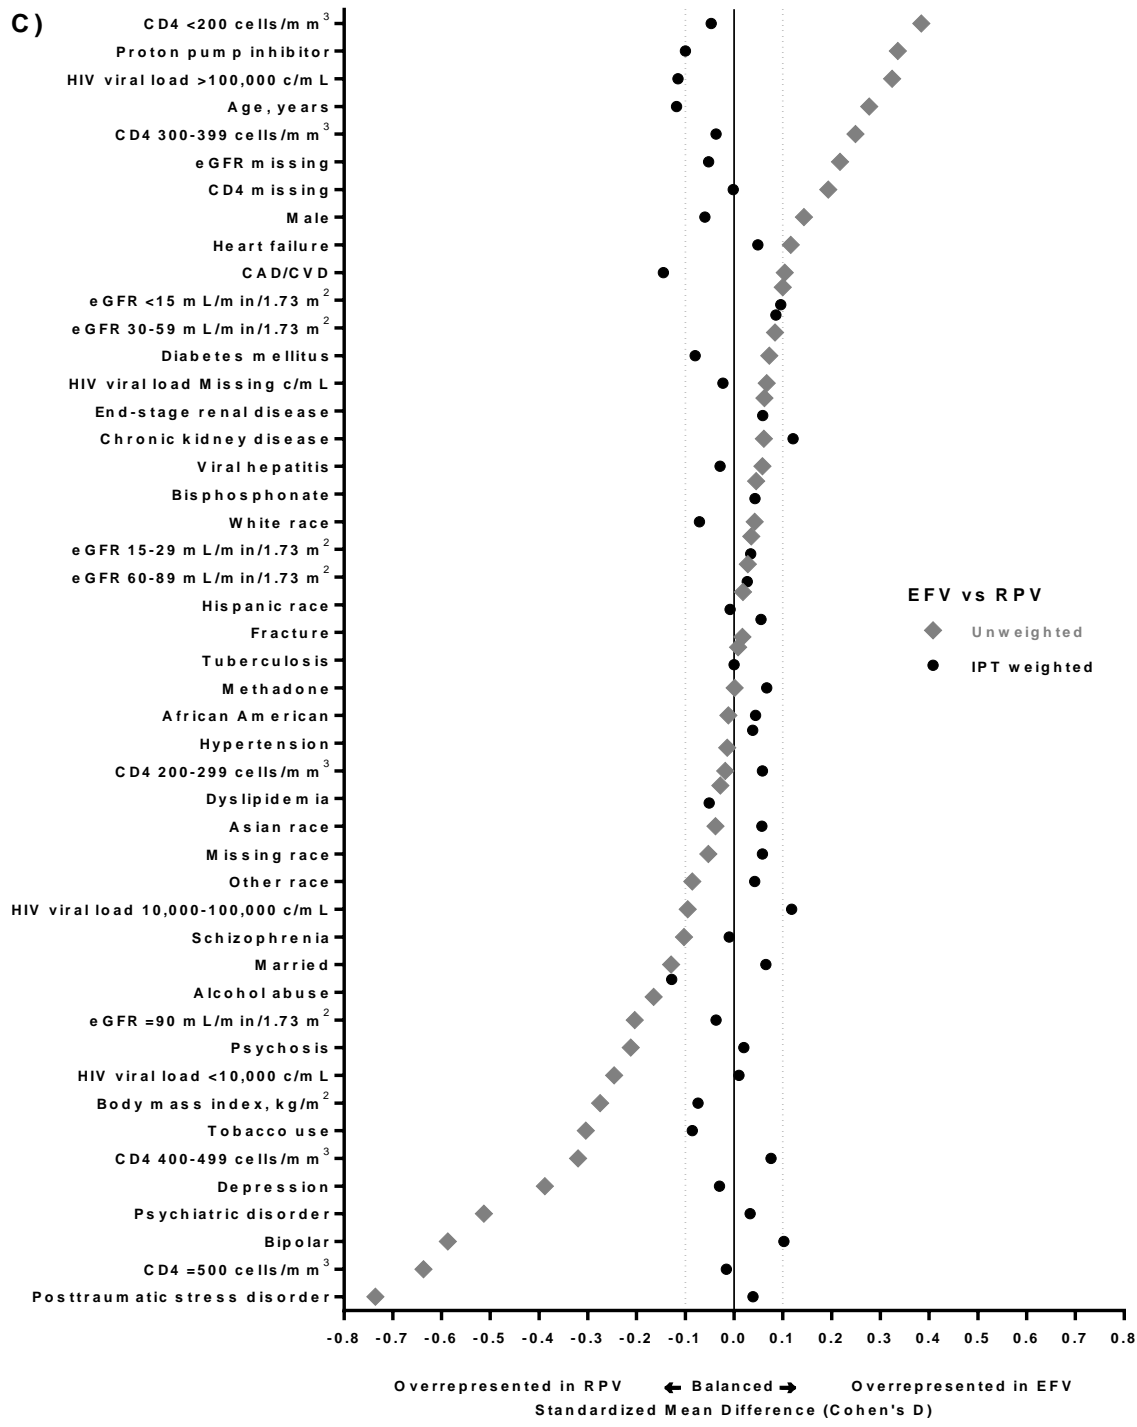

**Table 6.** Proportion with baseline or post-baseline DEXA scans.

| <b>Treatment group</b> | <b>Percent with pre-index scan</b> | <b>Percent with post-index scan</b> |
|------------------------|------------------------------------|-------------------------------------|
| EFV/TDF/FTC            | 0.85%                              | 16.75%                              |
| Non-EFV*               | 0.83%                              | 14.15%                              |
| EVG/c/TDF/FTC          | 1.29%                              | 6.03%                               |
| RPV/TDF/FTC            | 1.75%                              | 6.43%                               |
| RTV-boosted PI/TDF/FTC | 0.72%                              | 15.38%                              |

\*Non-EFV includes the EVG/c, RPV, and RTV-boosted PI groups.

DEXA, dual energy X-ray absorptiometry; EFV, efavirenz; EVG/c, elvitegravir/cobicistat; FTC, emtricitabine; PI, protease inhibitor (atazanavir, darunavir, or lopinavir); RPV, rilpivirine; RTV, ritonavir; SD, standard deviation; TDF, tenofovir disoproxil fumarate.

**Table 7.** Baseline characteristics by post-index DEXA scan, identified through NLP or CPT code.

| Pre-index demographic and clinical characteristics* | All patients | Post index scan |            |
|-----------------------------------------------------|--------------|-----------------|------------|
|                                                     |              | No scan         | Scan       |
| Age, mean (SD), years                               | 49.9 (10.1)  | 49.5 (10.2)     | 52.0 (9.1) |
| Male                                                | 96%          | 97%             | 93%        |
| Married                                             | 8%           | 8%              | 9%         |
| Race                                                |              |                 |            |
| White                                               | 30%          | 30%             | 32%        |
| Black                                               | 59%          | 60%             | 58%        |
| Hispanic                                            | 7%           | 7%              | 6%         |
| Asian                                               | 1%           | 1%              | 1%         |
| Other                                               | 1%           | 1%              | 0%         |
| Missing                                             | 2%           | 1%              | 3%         |
| CD4 <sup>+</sup> , cells/mm <sup>3</sup>            |              |                 |            |
| <200                                                | 33%          | 34%             | 31%        |
| 200–299                                             | 16%          | 16%             | 17%        |
| 300–399                                             | 14%          | 13%             | 15%        |
| 400–499                                             | 9%           | 9%              | 8%         |
| ≥500                                                | 14%          | 14%             | 13%        |
| Missing                                             | 14%          | 13%             | 16%        |
| HIV viral load, copies/ml                           |              |                 |            |
| <10,000                                             | 30%          | 30%             | 29%        |
| 10,000–100,000                                      | 33%          | 33%             | 34%        |
| >100,000                                            | 22%          | 22%             | 23%        |
| Missing                                             | 15%          | 15%             | 14%        |
| Chronic kidney disease <sup>†</sup>                 | 6%           | 6%              | 6%         |
| eGFR <sup>d</sup> , ml/min per 1.73 m <sup>2</sup>  |              |                 |            |
| Stage 1, ≥90                                        | 52%          | 53%             | 50%        |
| Stage 2, 60–89                                      | 33%          | 32%             | 35%        |
| Stage 3, 30–59                                      | 4%           | 4%              | 5%         |
| Stage 4, 15–29                                      | 0%           | 0%              | 0%         |
| Stage 5, <15                                        | 1%           | 1%              | 2%         |
| Missing                                             | 9%           | 10%             | 8%         |
| Cardiovascular and cerebrovascular disease          | 10%          | 10%             | 11%        |
| Heart failure                                       | 3%           | 3%              | 3%         |
| Dyslipidemia                                        | 15%          | 14%             | 17%        |
| Hypertension                                        | 34%          | 33%             | 37%        |
| Diabetes mellitus                                   | 13%          | 12%             | 15%        |
| End-stage renal disease <sup>‡</sup>                | 0%           | 0%              | 0%         |
| Viral hepatitis                                     | 28%          | 28%             | 27%        |
| Tuberculosis                                        | 1%           | 1%              | 1%         |
| Psychiatric disorder                                | 40%          | 40%             | 40%        |
| Depression                                          | 26%          | 26%             | 26%        |
| Schizophrenia                                       | 5%           | 5%              | 4%         |

|                                               |            |            |            |
|-----------------------------------------------|------------|------------|------------|
| Bipolar                                       | 18%        | 18%        | 17%        |
| Psychosis                                     | 8%         | 8%         | 6%         |
| Posttraumatic stress disorder                 | 10%        | 11%        | 10%        |
| Fracture                                      | 1%         | 1%         | 1%         |
| Tobacco use <sup>§</sup>                      | 31%        | 31%        | 31%        |
| Alcohol abuse                                 | 23%        | 24%        | 21%        |
| Body mass index, mean (SD), kg/m <sup>2</sup> | 25.5 (5.1) | 25.5 (5.1) | 25.6 (5.1) |
| Medications                                   |            |            |            |
| Methadone                                     | 2%         | 2%         | 2%         |
| Proton pump inhibitor                         | 26%        | 26%        | 30%        |
| Bisphosphonate                                | 0%         | 0%         | 1%         |
|                                               | 2%         | 1%         | 3%         |
| Year                                          |            |            |            |
| 2003                                          | 0%         | 0%         | 0%         |
| 2004                                          | 1%         | 1%         | 1%         |
| 2005                                          | 8%         | 8%         | 10%        |
| 2006                                          | 11%        | 11%        | 14%        |
| 2007                                          | 13%        | 12%        | 15%        |
| 2008                                          | 12%        | 12%        | 14%        |
| 2009                                          | 12%        | 11%        | 15%        |
| 2010                                          | 11%        | 11%        | 11%        |
| 2011                                          | 10%        | 10%        | 9%         |
| 2012                                          | 7%         | 8%         | 5%         |
| 2013                                          | 7%         | 7%         | 3%         |
| 2014                                          | 5%         | 6%         | 2%         |
| 2015                                          | 3%         | 4%         | 1%         |

\*Pre-index comorbidities and clinical characteristics were identified in the 6–12-month pre-index period.

†Defined as either a chronic kidney disease diagnosis or 2 consecutive measures of eGFR <60 mL/min/1.73 m<sup>2</sup> occurring at least 30 days apart.

‡Defined as either a diagnosis of end-stage renal disease, kidney transplant, or dialysis.

§Includes abuse, dependence, rehabilitation, and toxicity related to tobacco.

CPT, Current Procedural Terminology; DEXA, dual energy X-ray absorptiometry; EFV, efavirenz; eGFR, estimated glomerular filtration rate; EVG/c, elvitegravir/cobicistat; FTC, emtricitabine; NLP, natural language processing; PI, protease inhibitor (atazanavir, darunavir, or lopinavir); RPV, rilpivirine; RTV, ritonavir; SD, standard deviation; TDF, tenofovir disoproxil fumarate.
